# Supplementary material for: Development and validation of a meal quality index with applications to NHANES 2005-2014
Source: PubMed Central journal article supplement (PMC7755194; doi:10.1371/journal.pone.0244391), 2020-12-22
Supplement: pone.0244391.s001.pdf [file pone.0244391.s001.pdf]

## SUPPLEMENTARY MATERIAL

# Methodology for the development of menu plans

A 2-week menu plan was developed for each of the following three eating patterns of the 2015-2020 DGA, the healthy US, VEG and MED. A 1-week menu plan was developed based on the 2015 Mexican dietary guidelines. The task of completing these menu plans to align with daily and weekly national guidelines and the constraints of the key requirements and limitations were accomplished with the following steps (

Figure 1). The selection of food and beverage items were determined by key healthy eating recommendations from national guidelines e.g. when aligning with the recommendation for dairy items, low-fat milk was chosen for inclusion where appropriate. Generic food and beverage items were selected. Additionally, the following items were selected as fortified when available and appropriate to fit all other requirements; milk, chocolate milk, yogurt, margarine, orange juice, apple juice and grape juice. Food and beverage items containing saturated fats, added sugars, added sodium or alcohol were limited to meet national guidelines.

## Menu plan developmental methodology

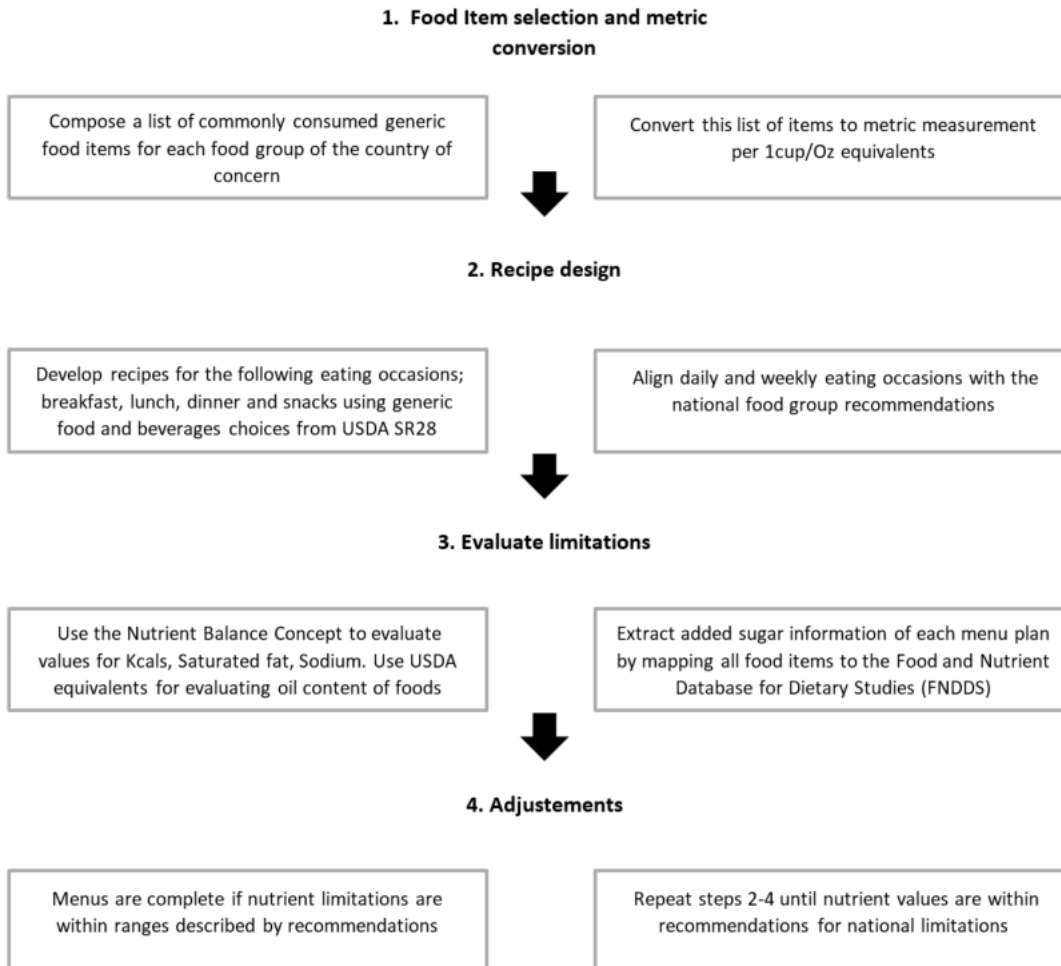

Figure 1: 1. Step-by-step methodology

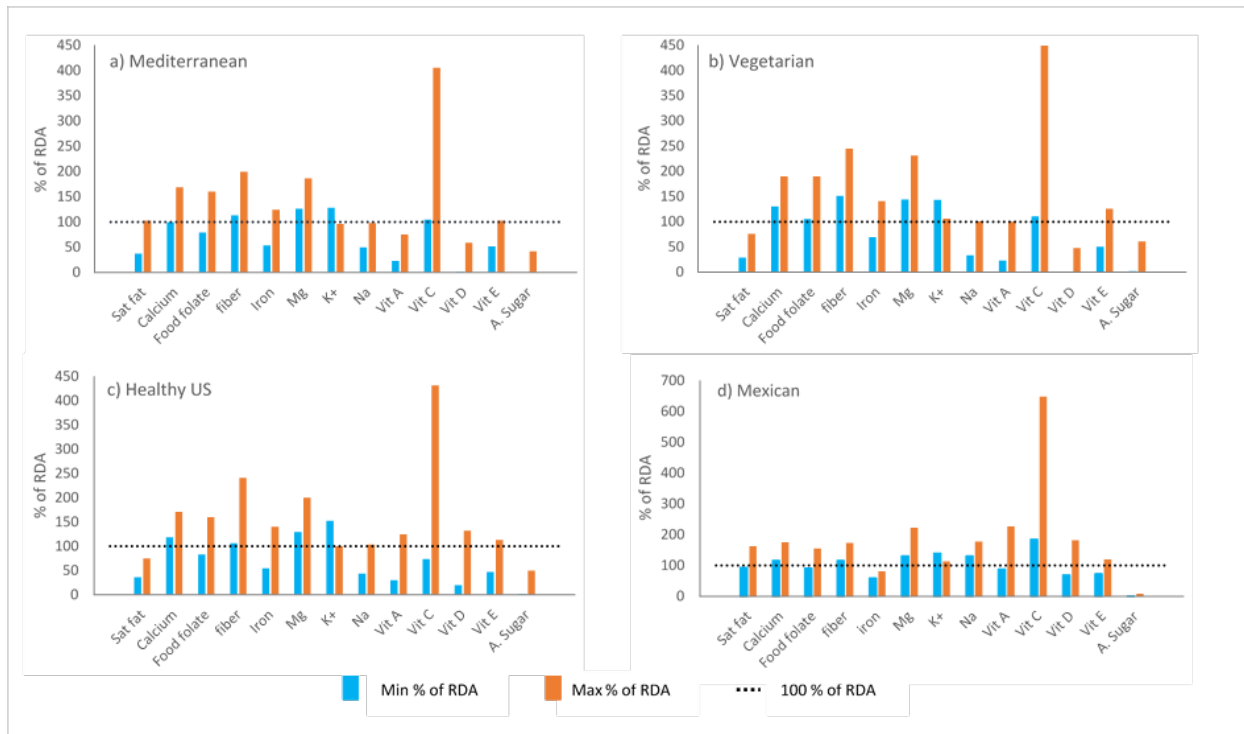

**Figure S2.** Nutrient profile of each menu plans expressed as a percentage of the national RDA for a 40 year old non-pregnant, non-lactating woman for a) Mediterranean, b) Vegetarian, c) US and d) Mexican.

## Mediterranean menu plan

| Day | Meal      | Usda  | Item                                                               | grams |
|-----|-----------|-------|--------------------------------------------------------------------|-------|
| 1   | Breakfast | 8122  | Cereals, oats, instant, fortified, plain, dry                      | 28    |
| 1   | Breakfast | 9316  | Strawberries, raw, sliced                                          | 83    |
| 1   | Breakfast | 1256  | Yogurt, Greek, plain, nonfat (170)                                 | 85    |
| 1   | Breakfast | 12063 | Nuts, almonds, dry roasted, without salt added (11 whole kernels ) | 14.2  |
| 1   | Breakfast | 1129  | Egg, whole, cooked, hard-boiled, 1 large egg                       | 50    |
| 1   | Breakfast | 1129  | Egg, whole, cooked, hard-boiled, 1 large egg                       | 50    |
| 1   | Lunch     | 18076 | Bread, whole-wheat, commercially prepared, toasted                 | 50    |
| 1   | Lunch     | 15121 | Fish, tuna, light, canned in water, drained solids                 | 113.2 |

*continued on next page*

*continued from previous page*

|   |           |       |                                                                                                 |       |
|---|-----------|-------|-------------------------------------------------------------------------------------------------|-------|
| 1 | Lunch     | 11168 | Corn, sweet, yellow, cooked, boiled, drained, without salt, 1 ear small (5-1/2" to 6-1/2" long) | 44.5  |
| 1 | Lunch     | 11251 | Lettuce, cos or romaine, raw, shredded (94)                                                     | 47    |
| 1 | Lunch     | 43355 | Mayonnaise, low sodium, low calorie or diet                                                     | 21    |
| 1 | Lunch     | 16229 | Soy milk (All flavors), lowfat, with added calcium, vitamins A and D                            | 243   |
| 1 | Dinner    | 20029 | Couscous, cooked                                                                                | 157.6 |
| 1 | Dinner    | 4053  | Oil, olive, salad or cooking                                                                    | 13.5  |
| 1 | Dinner    | 11032 | Lima beans, immature seeds, cooked, boiled, drained, without salt                               | 42.5  |
| 1 | Dinner    | 16043 | Beans, pinto, mature seeds, cooked, boiled, without salt (171)                                  | 85.5  |
| 1 | Dinner    | 11529 | Tomatoes, red, ripe, raw, year round average, 1 large whole (3" diameter) (123)                 | 61.5  |
| 1 | Dinner    | 11333 | Peppers, sweet, green, raw, chopped                                                             | 74.5  |
| 1 | Dinner    | 9195  | Olives, pickled, canned or bottled, green, 1 olive                                              | 10.8  |
| 1 | Dinner    | 9252  | Pears, raw, 1 medium                                                                            | 178   |
| 1 | Dinner    | 9040  | Bananas, raw, sliced                                                                            | 150   |
| 1 | Snacks    | 18216 | Crackers, crispbread, rye, 2 crispbread (20)                                                    | 20    |
| 1 | Snacks    | 12195 | Nuts, almond butter, plain, without salt added (16)                                             | 16    |
| 1 | Snacks    | 16158 | Hummus, commercial                                                                              | 15    |
| 1 | Snacks    | 1082  | Milk, lowfat, fluid, 1% milkfat, with added vitamin A and vitamin D (244)                       | 122   |
| 1 | Snacks    | 1082  | Milk, lowfat, fluid, 1% milkfat, with added vitamin A and vitamin D (244)                       | 122   |
| 1 | Water     | 14555 | Water, bottled, generic                                                                         | 2000  |
| 2 | Breakfast | 1131  | Egg, whole, cooked, poached (1 large)                                                           | 50    |
| 2 | Breakfast | 18075 | Bread, whole-wheat, commercially prepared, 1 slice                                              | 64    |
| 2 | Breakfast | 9037  | Avocados, raw, all commercial varieties, sliced                                                 | 68    |
| 2 | Breakfast | 1082  | Milk, lowfat, fluid, 1% milkfat, with added vitamin A and vitamin D (244)                       | 244   |
| 2 | Lunch     | 4053  | Oil, olive, salad or cooking                                                                    | 20.25 |
| 2 | Lunch     | 15047 | Fish, mackerel, Atlantic, cooked, dry heat, (28.3)                                              | 84.9  |
| 2 | Lunch     | 20037 | Rice, brown, long-grain, cooked                                                                 | 101   |

*continued on next page*

*continued from previous page*

|   |           |       |                                                                                                         |      |
|---|-----------|-------|---------------------------------------------------------------------------------------------------------|------|
| 2 | Lunch     | 11510 | Sweet potato, cooked, boiled, without skin, mashed                                                      | 164  |
| 2 | Lunch     | 11019 | Asparagus, frozen, cooked, boiled, drained, without salt (180)                                          | 45   |
| 2 | Lunch     | 11053 | Beans, snap, green, cooked, boiled, drained, without salt (125)                                         | 62.5 |
| 2 | Dinner    | 15165 | Mollusks, mussel, blue, cooked, moist heat                                                              | 56.6 |
| 2 | Dinner    | 20125 | Pasta, whole-wheat, cooked , spaghetti packed                                                           | 151  |
| 2 | Dinner    | 18036 | Bread, multi-grain, toasted (includes whole-grain)                                                      | 24   |
| 2 | Dinner    | 11885 | Tomatoes, red, ripe, canned, packed in tomato juice, no salt added (240)                                | 120  |
| 2 | Dinner    | 11457 | Spinach,raw                                                                                             | 15   |
| 2 | Dinner    | 9266  | Pineapple, raw, all varieties, chunks                                                                   | 165  |
| 2 | Dinner    | 9200  | Oranges, raw, all commercial varieties, 2 small (2-3/8" diameter)                                       | 48   |
| 2 | Snacks    | 9003  | Apples, raw, with skin, slices                                                                          | 109  |
| 2 | Snacks    | 1220  | Yogurt, vanilla, low fat, 11 grams protein per 8 ounce, fortified with vitamin D (245)                  | 245  |
| 2 | Snacks    | 12155 | Nuts, walnuts, english, 7 halves                                                                        | 7.1  |
| 2 | Snacks    | 12155 | Nuts, walnuts, english,                                                                                 | 7.1  |
| 2 | Water     | 14555 | Water, bottled, generic                                                                                 | 2000 |
| 3 | Breakfast | 1256  | Yogurt, Greek, plain, nonfat (170)                                                                      | 170  |
| 3 | Breakfast | 12037 | Seeds, sunflower seed kernels, dry roasted, without salt                                                | 7.1  |
| 3 | Breakfast | 9054  | Blueberries, frozen, unsweetened, unthawed                                                              | 155  |
| 3 | Breakfast | 1082  | Milk, lowfat, fluid, 1% milkfat, with added vitamin A and vitamin D (244)                               | 244  |
| 3 | Breakfast | 8123  | Cereals, oats, instant, fortified, plain, prepared with water (boiling water added or microwaved) (117) | 117  |
| 3 | Lunch     | 20125 | Pasta, whole-wheat, cooked , penne                                                                      | 97   |
| 3 | Lunch     | 9195  | Olives, pickled, canned or bottled, green, 1 olive                                                      | 10.8 |
| 3 | Lunch     | 11529 | Tomatoes, red, ripe, raw, year round average,                                                           | 37.2 |
| 3 | Lunch     | 11032 | Lima beans, immature seeds, cooked, boiled, drained, without salt (170)                                 | 85   |
| 3 | Lunch     | 7933  | Chicken breast, oven-roasted, fat-free, sliced (28.3)                                                   | 84.3 |
| 3 | Lunch     | 4053  | Oil, olive, salad or cooking                                                                            | 6.75 |

*continued on next page*

*continued from previous page*

|   |           |       |                                                                                     |       |
|---|-----------|-------|-------------------------------------------------------------------------------------|-------|
| 3 | Dinner    | 16070 | Lentils, mature seeds, cooked, boiled, without salt                                 | 49.59 |
| 3 | Dinner    | 20137 | Quinoa, cooked                                                                      | 185   |
| 3 | Dinner    | 15137 | Crustaceans, crab, alaska king, cooked, moist heat                                  | 56.6  |
| 3 | Dinner    | 11305 | Peas, green, cooked, boiled, drained, without salt (160)                            | 80    |
| 3 | Dinner    | 16057 | Chickpeas (garbanzo beans, bengal gram), mature seeds, cooked, boiled, without salt | 41    |
| 3 | Dinner    | 11885 | Tomatoes, red, ripe, canned, packed in tomato juice, no salt added                  | 120   |
| 3 | Dinner    | 11821 | Peppers, sweet, red, raw,1 Large, approx 3-3/4" long, 3" diameter                   | 82    |
| 3 | Dinner    | 4053  | Oil, olive, salad or cooking                                                        | 13.5  |
| 3 | Dinner    | 9326  | Watermelon, raw, diced                                                              | 76    |
| 3 | Dinner    | 9003  | Apple, raw, with skin, 1 small small (2-3/4" diameter) (149)                        | 149   |
| 3 | Snacks    | 18216 | Crackers, crispbread, rye, 2 crispbread                                             | 20    |
| 3 | Snacks    | 9279  | Plums, raw, sliced                                                                  | 165   |
| 3 | Snacks    | 9040  | Bananas, raw, 1 large (8" to 8-7/8" long) (136)                                     | 136   |
| 3 | Snacks    | 1082  | Milk, lowfat, fluid, 1% milkfat, with added vitamin A and vitamin D (244)           | 122   |
| 3 | Water     | 14555 | Water, bottled, generic                                                             | 2000  |
| 4 | Breakfast | 1129  | Egg, whole, cooked, hard-boiled, 1 large egg                                        | 100   |
| 4 | Breakfast | 18076 | Bread, whole-wheat, commercially prepared, toasted, 1 slice                         | 50    |
| 4 | Breakfast | 11529 | Tomatoes, red, ripe, raw, year round average, cherry tomatoes                       | 74.4  |
| 4 | Breakfast | 1082  | Milk, lowfat, fluid, 1% milkfat, with added vitamin A and vitamin D (244)           | 244   |
| 4 | Lunch     | 28318 | Bread, french or vienna, whole wheat,1 slice                                        | 96    |
| 4 | Lunch     | 6192  | Split pea soup, canned, reduced sodium, prepared with water or ready-to serve       | 126.5 |
| 4 | Lunch     | 1243  | Fat free ice cream, no sugar added, flavors other than chocolate                    | 93    |
| 4 | Lunch     | 9286  | Pomegranates, raw                                                                   | 43.5  |
| 4 | Dinner    | 20137 | Quinoa, cooked                                                                      | 185   |
| 4 | Dinner    | 11053 | Beans, snap, green, cooked, boiled, drained, without salt                           | 62.5  |
| 4 | Dinner    | 11206 | Cucumber, peeled, raw,sliced                                                        | 59.5  |

*continued on next page*

*continued from previous page*

|   |           |       |                                                                                                                                       |       |
|---|-----------|-------|---------------------------------------------------------------------------------------------------------------------------------------|-------|
| 4 | Dinner    | 11032 | Lima beans, immature seeds, cooked, boiled, drained, without salt                                                                     | 85    |
| 4 | Dinner    | 11885 | Tomatoes, red, ripe, canned, packed in tomato juice, no salt added (240)                                                              | 120   |
| 4 | Dinner    | 7933  | Chicken breast, oven-roasted, fat-free, sliced                                                                                        | 99.05 |
| 4 | Dinner    | 4053  | Oil, olive, salad or cooking                                                                                                          | 27    |
| 4 | Snacks    | 1220  | Yogurt, vanilla, low fat, 11 grams protein per 8 ounce, fortified with vitamin D (245)                                                | 245   |
| 4 | Snacks    | 9111  | Grapefruit, raw, pink and red and white, all areas, sections                                                                          | 230   |
| 4 | Snacks    | 9210  | Orange juice, chilled, includes from concentrate, with added calcium and vitamin D (249)                                              | 249   |
| 4 | Snacks    | 9181  | Melons, cantaloupe, raw, balls                                                                                                        | 78    |
| 4 | Water     | 14555 | Water, bottled, generic                                                                                                               | 2000  |
| 5 | Breakfast | 1129  | Egg, whole, cooked, hard-boiled, 1 large egg                                                                                          | 100   |
| 5 | Breakfast | 1168  | Cheese, low fat, cheddar or colby, shredded                                                                                           | 18.85 |
| 5 | Breakfast | 4053  | Oil, olive, salad or cooking                                                                                                          | 13.5  |
| 5 | Breakfast | 11529 | Tomatoes, red, ripe, raw, year round average, 2 small whole (2-2/5" diameter)                                                         | 91    |
| 5 | Breakfast | 11457 | Spinach,raw                                                                                                                           | 15    |
| 5 | Lunch     | 18042 | Bread, pita, whole-wheat,1 small (4" diameter) (28)                                                                                   | 56    |
| 5 | Lunch     | 11252 | Lettuce, iceberg (includes crisphead types), raw, chopped 1/2" pieces, loosely packed (114)                                           | 28.5  |
| 5 | Lunch     | 5168  | Turkey, whole, meat only, cooked, roasted (28.3)                                                                                      | 70.75 |
| 5 | Lunch     | 9195  | Olives, pickled, canned or bottled, green, 1 olive (2.7 (0.41g oil)                                                                   | 10.8  |
| 5 | Dinner    | 20029 | Couscous, cooked                                                                                                                      | 157.6 |
| 5 | Dinner    | 15116 | Fish, trout, rainbow, wild, cooked, dry heat                                                                                          | 56.6  |
| 5 | Dinner    | 11099 | Brussels sprouts, cooked, boiled, drained, without salt                                                                               | 78    |
| 5 | Dinner    | 11934 | Potatoes , mashed, home-prepared, whole milk and butter added -(Recipe: Potatoes, 80% ; whole milk, 14% ; butter, 5% ; and salt, 1% ) | 105   |
| 5 | Dinner    | 16057 | Chickpeas (garbanzo beans, bengal gram), mature seeds, cooked, boiled, without salt                                                   | 82    |
| 5 | Dinner    | 4053  | Oil, olive, salad or cooking                                                                                                          | 6.25  |
| 5 | Dinner    | 1243  | Fat free ice cream, no sugar added, flavors other than chocolate                                                                      | 93    |
| 5 | Dinner    | 9236  | Peaches, yellow, raw, Slices                                                                                                          | 175   |

*continued on next page*

*continued from previous page*

|   |           |       |                                                                                          |       |
|---|-----------|-------|------------------------------------------------------------------------------------------|-------|
| 5 | Snacks    | 8120  | Cereals, oats, regular and quick, not fortified, dry                                     | 27    |
| 5 | Snacks    | 1220  | Yogurt, vanilla, low fat, 11 grams protein per 8 ounce, fortified with vitamin D (245)   | 245   |
| 5 | Snacks    | 9040  | Bananas, raw, sliced (150)                                                               | 150   |
| 5 | Snacks    | 9298  | Raisins, seedless, packed (82.5)                                                         | 41.25 |
| 5 | Snacks    | 18216 | Crackers, crispbread, rye, 2 crispbread (20)                                             | 20    |
| 5 | Snacks    | 9252  | Pears, raw,1 medium (178)                                                                | 178   |
| 5 | Water     | 14555 | Water, bottled, generic                                                                  | 2000  |
| 6 | Breakfast | 1129  | Egg, whole, cooked, hard-boiled, 1 large egg                                             | 50    |
| 6 | Breakfast | 1168  | Cheese, low fat, cheddar or colby (42.5)                                                 | 21.25 |
| 6 | Breakfast | 18036 | Bread, multi-grain, toasted (includes whole-grain)                                       | 48    |
| 6 | Breakfast | 9210  | Orange juice, chilled, includes from concentrate, with added calcium and vitamin D (249) | 249   |
| 6 | Lunch     | 7933  | Chicken breast, oven-roasted, fat-free, sliced                                           | 56.6  |
| 6 | Lunch     | 11885 | Tomatoes, red, ripe, canned, packed in tomato juice, no salt added (240)                 | 60    |
| 6 | Lunch     | 11261 | Mushrooms, white, cooked, boiled, drained, without salt (156)                            | 39    |
| 6 | Lunch     | 20037 | Rice, brown, long-grain, cooked (101)                                                    | 101   |
| 6 | Lunch     | 16057 | Chickpeas (garbanzo beans, bengal gram), mature seeds, cooked, boiled, without salt      | 41    |
| 6 | Lunch     | 1168  | Cheese, low fat, cheddar or colby, shredded                                              | 18.85 |
| 6 | Lunch     | 11168 | Corn, sweet, yellow, cooked, boiled, drained, without salt, cut (149)                    | 37.25 |
| 6 | Dinner    | 20125 | Pasta, whole-wheat, cooked , shells                                                      | 105   |
| 6 | Dinner    | 11053 | Beans, snap, green, cooked, boiled, drained, without salt                                | 62.5  |
| 6 | Dinner    | 11885 | Tomatoes, red, ripe, canned, packed in tomato juice, no salt added                       | 120   |
| 6 | Dinner    | 11313 | Peas, green, frozen, cooked, boiled, drained, without salt (80)                          | 40    |
| 6 | Dinner    | 23478 | Beef, ground, 97% lean meat / 3% fat, patty, cooked, broiled                             | 99.05 |
| 6 | Dinner    | 4053  | Oil, olive, salad or cooking                                                             | 27    |
| 6 | Dinner    | 9132  | Grapes,32 red or green (European type, such as Thompson seedless), raw                   | 78.4  |
| 6 | Snacks    | 9040  | Bananas, raw, sliced (150)                                                               | 150   |

*continued on next page*



*continued from previous page*

|   |           |       |                                                                                        |        |
|---|-----------|-------|----------------------------------------------------------------------------------------|--------|
| 6 | Snacks    | 1220  | Yogurt, vanilla, low fat, 11 grams protein per 8 ounce, fortified with vitamin D (245) | 245    |
| 6 | Snacks    | 18061 | Bread, rye, toasted, regular slice (24)                                                | 24     |
| 6 | Snacks    | 1129  | Egg, whole, cooked, hard-boiled, 1 large egg                                           | 50     |
| 6 | Snacks    | 1082  | Milk, lowfat, fluid, 1% milkfat, with added vitamin A and vitamin D (244)              | 244    |
| 6 | Water     | 14555 | Water, bottled, generic                                                                | 2000   |
| 7 | Breakfast | 11529 | Tomatoes, red, ripe, raw, year round average, cherry tomatoes                          | 37.25  |
| 7 | Breakfast | 11091 | Broccoli, cooked, boiled, drained, without salt, chopped (156)                         | 39     |
| 7 | Breakfast | 15209 | Fish, salmon, Atlantic, wild, cooked, dry heat                                         | 56.6   |
| 7 | Breakfast | 1131  | Egg, whole, cooked, poached (1 large) (50)                                             | 100    |
| 7 | Breakfast | 4053  | Oil, olive, salad or cooking                                                           | 13.5   |
| 7 | Lunch     | 20029 | Couscous, cooked (78.5)                                                                | 157.6  |
| 7 | Lunch     | 9195  | Olives, pickled, canned or bottled, green, 1 olive (2.7 (0.41g oil))                   | 21.6   |
| 7 | Lunch     | 1029  | Cheese, mozzarella, low moisture, part-skim, shredded (28.7)                           | 28.7   |
| 7 | Lunch     | 11168 | Corn, sweet, yellow, cooked, boiled, drained, without salt, cut (149)                  | 111.75 |
| 7 | Lunch     | 11529 | Tomatoes, red, ripe, raw, year round average, 1 large whole (3" diameter) (123)        | 61.5   |
| 7 | Dinner    | 10011 | Pork, fresh, leg (ham), whole, separable lean only, cooked, roasted (28.3)             | 70.75  |
| 7 | Dinner    | 20037 | Rice, brown, long-grain, cooked (101)                                                  | 101    |
| 7 | Dinner    | 9278  | Plantains, cooked, sliced (154)                                                        | 77     |
| 7 | Dinner    | 11313 | Peas, green, frozen, cooked, boiled, drained, without salt (80)                        | 40     |
| 7 | Dinner    | 4053  | Oil, olive, salad or cooking                                                           | 6.25   |
| 7 | Dinner    | 9050  | Blueberries, raw (148)                                                                 | 74     |
| 7 | Dinner    | 9040  | Bananas, raw, 1 large (8" to 8-7/8" long) (136)                                        | 136    |
| 7 | Snacks    | 1082  | Milk, lowfat, fluid, 1% milkfat, with added vitamin A and vitamin D (244)              | 244    |
| 7 | Snacks    | 18061 | Bread, rye, toasted, regular slice (24)                                                | 48     |
| 7 | Snacks    | 9094  | Figs, dried, uncooked (74.5)                                                           | 37.25  |
| 7 | Snacks    | 18216 | Crackers, crispbread, rye, 2 crispbread (20)                                           | 20     |

*continued on next page*

*continued from previous page*

|   |           |       |                                                                                                         |        |
|---|-----------|-------|---------------------------------------------------------------------------------------------------------|--------|
| 7 | Snacks    | 12195 | Nuts, almond butter, plain, without salt added (16)                                                     | 16     |
| 7 | Snacks    | 1220  | Yogurt, vanilla, low fat, 11 grams protein per 8 ounce, fortified with vitamin D (245)                  | 122.5  |
| 7 | Water     | 14555 | Water, bottled, generic                                                                                 | 2000   |
| 8 | Breakfast | 8123  | Cereals, oats, instant, fortified, plain, prepared with water (boiling water added or microwaved) (117) | 117    |
| 8 | Breakfast | 1082  | Milk, lowfat, fluid, 1% milkfat, with added vitamin A and vitamin D (244)                               | 244    |
| 8 | Breakfast | 12016 | Seeds, pumpkin and squash seed kernels, roasted, without salt (14.2)                                    | 7.1    |
| 8 | Breakfast | 12155 | Nuts, walnuts, english, 7 halves (14.2)                                                                 | 7.1    |
| 8 | Breakfast | 9040  | Bananas, raw, sliced (150)                                                                              | 150    |
| 8 | Breakfast | 18076 | Bread, whole-wheat, commercially prepared, toasted, 1 slice, (25)                                       | 50     |
| 8 | Breakfast | 1129  | Egg, whole, cooked, hard-boiled, 1 large egg                                                            | 50     |
| 8 | Lunch     | 20137 | Quinoa, cooked (92.5)                                                                                   | 157    |
| 8 | Lunch     | 11291 | Onions, spring or scallions (includes tops and bulb), raw, chopped (100)                                | 52.75  |
| 8 | Lunch     | 11529 | Tomatoes, red, ripe, raw, year round average, cherry tomatoes (149)                                     | 111.75 |
| 8 | Lunch     | 7933  | Chicken breast, oven-roasted, fat-free, sliced (28.3)                                                   | 70.75  |
| 8 | Lunch     | 4053  | Oil, olive, salad or cooking                                                                            | 6.25   |
| 8 | Lunch     | 9195  | Olives, pickled, canned or bottled, green, 1 olive                                                      | 8.1    |
| 8 | Lunch     | 11053 | Beans, snap, green, cooked, boiled, drained, without salt (125)                                         | 62.5   |
| 8 | Dinner    | 11367 | Potatoes, boiled, cooked without skin, flesh, without salt (156)                                        | 156    |
| 8 | Dinner    | 4053  | Oil, olive, salad or cooking                                                                            | 13.5   |
| 8 | Dinner    | 11529 | Tomatoes, red, ripe, raw, year round average, 2 small whole (2-2/5" diameter) (182)                     | 91     |
| 8 | Dinner    | 15034 | Fish, haddock, cooked, dry heat (28.3)                                                                  | 84.9   |
| 8 | Dinner    | 9195  | Olives, pickled, canned or bottled, green, 1 olive                                                      | 8.1    |
| 8 | Dinner    | 11019 | Asparagus, frozen, cooked, boiled, drained, without salt (180)                                          | 45     |
| 8 | Dinner    | 9316  | Strawberries, raw, 8 large (1-3/8" diameter), (144)                                                     | 72     |
| 8 | Dinner    | 1220  | Yogurt, vanilla, low fat, 11 grams protein per 8 ounce, fortified with vitamin D (245)                  | 245    |
| 8 | Snacks    | 9210  | Orange juice, chilled, includes from concentrate, with added calcium and vitamin D (249)                | 249    |

*continued on next page*

*continued from previous page*

|   |           |       |                                                                                              |       |
|---|-----------|-------|----------------------------------------------------------------------------------------------|-------|
| 8 | Snacks    | 18235 | Crackers, whole-wheat, 5 crackers (23)                                                       | 23    |
| 8 | Snacks    | 12195 | Nuts, almond butter, plain, without salt added (16)                                          | 8     |
| 8 | Water     | 14555 | Water, bottled, generic                                                                      | 2000  |
| 9 | Breakfast | 1131  | Egg, whole, cooked, poached (1 large) (50)                                                   | 100   |
| 9 | Breakfast | 1082  | Milk, lowfat, fluid, 1% milkfat, with added vitamin A and vitamin D (244)                    | 244   |
| 9 | Breakfast | 1019  | Cheese, feta, crumbled (150)                                                                 | 37.5  |
| 9 | Breakfast | 11529 | Tomatoes, red, ripe, raw, year round average, 1 large whole (3" diameter) (123)              | 30.75 |
| 9 | Breakfast | 28397 | Bread, multi-grain (includes whole-grain),1 slice regular (26)                               | 52    |
| 9 | Lunch     | 15151 | Crustaceans, shrimp, mixed species, cooked, moist heat (may have been previously frozen)     | 70.75 |
| 9 | Lunch     | 20125 | Pasta, whole-wheat, cooked , spaghetti packed (75.5)                                         | 226.5 |
| 9 | Lunch     | 11458 | Spinach, cooked, boiled, drained, without salt (180)                                         | 45    |
| 9 | Lunch     | 4053  | Oil, olive, salad or cooking                                                                 | 6.25  |
| 9 | Lunch     | 18076 | Bread, whole-wheat, commercially prepared, toasted, 1 slice, (25)                            | 25    |
| 9 | Lunch     | 1032  | Cheese, parmesan, grated (42.5)                                                              | 10.6  |
| 9 | Dinner    | 11357 | Potatoes, white, flesh and skin, baked, medium (2-1/4" to 3-1/4" diameter) (173)             | 173   |
| 9 | Dinner    | 11478 | Squash, summer, zucchini, includes skin, cooked, boiled, drained, without salt, sliced (180) | 45    |
| 9 | Dinner    | 11283 | Onions, cooked, boiled, drained, without salt (210)                                          | 52.5  |
| 9 | Dinner    | 11821 | Peppers, sweet, red, raw,1 Large, approx 3-3/4" long, 3" diameter (164)                      | 82    |
| 9 | Dinner    | 7933  | Chicken breast, oven-roasted, fat-free, sliced (28.3)                                        | 56.6  |
| 9 | Dinner    | 4053  | Oil, olive, salad or cooking                                                                 | 13.5  |
| 9 | Dinner    | 11529 | Tomatoes, red, ripe, raw, year round average, 2 small whole (2-2/5" diameter) (182)          | 91    |
| 9 | Dinner    | 1220  | Yogurt, vanilla, low fat, 11 grams protein per 8 ounce, fortified with vitamin D (245)       | 122.5 |
| 9 | Dinner    | 9003  | Apple, raw, with skin, 1 small small (2-3/4" diameter) (149)                                 | 149   |
| 9 | Snacks    | 9200  | Oranges, raw, all commercial varieties, 1 large (3-1/16" diameter) (184)                     | 184   |
| 9 | Snacks    | 9326  | Watermelon, raw, 12 balls (146.4)                                                            | 73.2  |
| 9 | Snacks    | 1220  | Yogurt, vanilla, low fat, 11 grams protein per 8 ounce, fortified with vitamin D (245)       | 122.5 |

*continued on next page*

*continued from previous page*

|    |           |       |                                                                                                                                             |       |
|----|-----------|-------|---------------------------------------------------------------------------------------------------------------------------------------------|-------|
| 9  | Snacks    | 12063 | Nuts, almonds, dry roasted, without salt added (11 whole kernels ) (14.2)                                                                   | 14.2  |
| 9  | Water     | 14555 | Water, bottled, generic                                                                                                                     | 2000  |
| 10 | Breakfast | 8123  | Cereals, oats, instant, fortified, plain, prepared with water (boiling water added or microwaved) (117)                                     | 117   |
| 10 | Breakfast | 12037 | Seeds, sunflower seed kernels, dry roasted, without salt (14.2)                                                                             | 7.1   |
| 10 | Breakfast | 1256  | Yogurt, Greek, plain, nonfat (170)                                                                                                          | 85    |
| 10 | Breakfast | 9302  | Raspberries, raw (120)                                                                                                                      | 60    |
| 10 | Breakfast | 9040  | Bananas, raw, sliced (150)                                                                                                                  | 150   |
| 10 | Lunch     | 28397 | Bread, multi-grain (includes whole-grain),1 slice regular (26)                                                                              | 52    |
| 10 | Lunch     | 15121 | Fish, tuna, light, canned in water, drained solids (28.3)                                                                                   | 56.6  |
| 10 | Lunch     | 43355 | Mayonnaise, low sodium, low calorie or diet                                                                                                 | 28    |
| 10 | Lunch     | 11529 | Tomatoes, red, ripe, raw, year round average, 1 large whole (3" diameter) (123)                                                             | 30.75 |
| 10 | Lunch     | 11168 | Corn, sweet, yellow, cooked, boiled, drained, without salt, cut (149)                                                                       | 73    |
| 10 | Lunch     | 11478 | Squash, summer, zucchini, includes skin, cooked, boiled, drained, without salt, sliced (180)                                                | 90    |
| 10 | Lunch     | 1082  | Milk, lowfat, fluid, 1% milkfat, with added vitamin A and vitamin D (244)                                                                   | 122   |
| 10 | Dinner    | 15047 | Fish, mackerel, Atlantic, cooked, dry heat, (28.3)                                                                                          | 84.9  |
| 10 | Dinner    | 11934 | Potatoes , mashed, home-prepared, whole milk and butter added -(Recipe: Potatoes, 80% ; whole milk, 14% ; butter, 5% ; and salt, 1% ) (210) | 105   |
| 10 | Dinner    | 11019 | Asparagus, frozen, cooked, boiled, drained, without salt (180)                                                                              | 45    |
| 10 | Dinner    | 20037 | Rice, brown, long-grain, cooked (101)                                                                                                       | 303   |
| 10 | Dinner    | 4053  | Oil, olive, salad or cooking                                                                                                                | 6.25  |
| 10 | Dinner    | 11053 | Beans, snap, green, cooked, boiled, drained, without salt (125)                                                                             | 62.5  |
| 10 | Dinner    | 9132  | Grapes,32 red or green (European type, such as Thompson seedless), raw (156.8)                                                              | 78.4  |
| 10 | Dinner    | 9266  | Pineapple, raw, all varieties, chunks (165)                                                                                                 | 165   |
| 10 | Snacks    | 9094  | Figs, dried, uncooked (74.5)                                                                                                                | 37.25 |
| 10 | Snacks    | 12155 | Nuts, walnuts, english, 7 halves (14.2)                                                                                                     | 7.1   |
| 10 | Snacks    | 1220  | Yogurt, vanilla, low fat, 11 grams protein per 8 ounce, fortified with vitamin D (245)                                                      | 245   |

*continued on next page*

*continued from previous page*

|    |           |       |                                                                                                                      |       |
|----|-----------|-------|----------------------------------------------------------------------------------------------------------------------|-------|
| 10 | Water     | 14555 | Water, bottled, generic                                                                                              | 2000  |
| 11 | Breakfast | 9037  | Avocados, raw, all commercial varieties, sliced (146)                                                                | 73    |
| 11 | Breakfast | 18061 | Bread, rye, toasted, regular slice (24)                                                                              | 48    |
| 11 | Breakfast | 1019  | Cheese, feta, crumbled (150)                                                                                         | 75    |
| 11 | Breakfast | 1131  | Egg, whole, cooked, poached (1 large) (50)                                                                           | 50    |
| 11 | Breakfast | 1131  | Egg, whole, cooked, poached (1 large) (50)                                                                           | 50    |
| 11 | Breakfast | 9210  | Orange juice, chilled, includes from concentrate, with added calcium and vitamin D (249)                             | 249   |
| 11 | Lunch     | 28397 | Bread, multi-grain (includes whole-grain),1 slice regular                                                            | 52    |
| 11 | Lunch     | 11251 | Lettuce, cos or romaine, raw, shredded (94)                                                                          | 47    |
| 11 | Lunch     | 11283 | Onions, cooked, boiled, drained, without salt (210)                                                                  | 52.5  |
| 11 | Lunch     | 17012 | Lamb, domestic, leg, whole (shank and sirloin), separable lean and fat, trimmed to 1/4" fat, choice, cooked, roasted | 70.75 |
| 11 | Lunch     | 11206 | Cucumber, peeled, raw,sliced (119)                                                                                   | 29.75 |
| 11 | Lunch     | 4017  | Salad dressing, thousand island, commercial, regular                                                                 | 28    |
| 11 | Lunch     | 1082  | Milk, lowfat, fluid, 1% milkfat, with added vitamin A and vitamin D (244)                                            | 246   |
| 11 | Dinner    | 15209 | Fish, salmon, Atlantic, wild, cooked, dry heat                                                                       | 84.9  |
| 11 | Dinner    | 11821 | Peppers, sweet, red, raw,1 Large, approx 3-3/4" long, 3" diameter (164)                                              | 82    |
| 11 | Dinner    | 11261 | Mushrooms, white, cooked, boiled, drained, without salt (156)                                                        | 78    |
| 11 | Dinner    | 20125 | Pasta, whole-wheat, cooked , spaghetti packed (75.5)                                                                 | 151   |
| 11 | Dinner    | 4053  | Oil, olive, salad or cooking                                                                                         | 13.5  |
| 11 | Dinner    | 9132  | Grapes,32 red or green (European type, such as Thompson seedless), raw (156.8)                                       | 78.4  |
| 11 | Dinner    | 1256  | Yogurt, Greek, plain, nonfat (170)                                                                                   | 85    |
| 11 | Snacks    | 9050  | Blueberries, raw (148)                                                                                               | 148   |
| 11 | Snacks    | 9003  | Apple, raw, with skin, 1 small small (2-3/4" diameter) (149)                                                         | 149   |
| 11 | Snacks    | 9286  | Pomegranates, raw                                                                                                    | 87    |
| 11 | Water     | 14555 | Water, bottled, generic                                                                                              | 2000  |
| 12 | Breakfast | 28397 | Bread, multi-grain (includes whole-grain),1 slice regular (26)                                                       | 52    |

*continued on next page*

*continued from previous page*

|    |           |       |                                                                                       |        |
|----|-----------|-------|---------------------------------------------------------------------------------------|--------|
| 12 | Breakfast | 11529 | Tomatoes, red, ripe, raw, year round average, 1 large whole (3" diameter) (123)       | 99.25  |
| 12 | Breakfast | 1131  | Egg, whole, cooked, poached (1 large) (50)                                            | 100    |
| 12 | Breakfast | 16229 | Soymilk (All flavors), lowfat, with added calcium, vitamins A and D (243)             | 243    |
| 12 | Lunch     | 18061 | Bread, rye, toasted, regular slice (24)                                               | 48     |
| 12 | Lunch     | 16028 | Beans, kidney, all types, mature seeds, cooked, boiled, without salt (44.25)          | 22.13  |
| 12 | Lunch     | 11251 | Lettuce, cos or romaine, raw, shredded (94)                                           | 23.5   |
| 12 | Lunch     | 7933  | Chicken breast, oven-roasted, fat-free, sliced (28.3)                                 | 70.75  |
| 12 | Lunch     | 43355 | Mayonnaise, low sodium, low calorie or diet                                           | 21     |
| 12 | Lunch     | 6192  | Split pea soup, canned, reduced sodium, prepared with water or ready-to serve (126.5) | 189.75 |
| 12 | Dinner    | 20137 | Quinoa, cooked (92.5)                                                                 | 185    |
| 12 | Dinner    | 16028 | Beans, kidney, all types, mature seeds, cooked, boiled, without salt (177)            | 177    |
| 12 | Dinner    | 11032 | Lima beans, immature seeds, cooked, boiled, drained, without salt (170)               | 85     |
| 12 | Dinner    | 4053  | Oil, olive, salad or cooking                                                          | 20.25  |
| 12 | Dinner    | 11529 | Tomatoes, red, ripe, raw, year round average, 1 large whole (3" diameter) (123)       | 61.5   |
| 12 | Dinner    | 11283 | Onions, cooked, boiled, drained, without salt (210)                                   | 52.5   |
| 12 | Dinner    | 9003  | Apple, raw, with skin, 1 small small (2-3/4" diameter) (149)                          | 149    |
| 12 | Snacks    | 9316  | Strawberries, raw, sliced (166)                                                       | 83     |
| 12 | Snacks    | 9111  | Grapefruit, raw, pink and red and white, all areas, sections (230)                    | 230    |
| 12 | Snacks    | 1256  | Yogurt, Greek, plain, nonfat (170)                                                    | 170    |
| 12 | Snacks    | 9040  | Bananas, raw, 1 large (8" to 8-7/8" long) (136)                                       | 136    |
| 12 | Water     | 14555 | Water, bottled, generic                                                               | 2000   |
| 13 | Breakfast | 1256  | Yogurt, Greek, plain, nonfat (170)                                                    | 170    |
| 13 | Breakfast | 8122  | Cereals, oats, instant, fortified, plain, dry, 1 packet (28)                          | 28     |
| 13 | Breakfast | 9050  | Blueberries, raw (148)                                                                | 74     |
| 13 | Breakfast | 9040  | Bananas, raw, 2 small ,less than 6" long (81)                                         | 40.5   |
| 13 | Breakfast | 16229 | Soymilk (All flavors), lowfat, with added calcium, vitamins A and D (243)             | 121.5  |

*continued on next page*

*continued from previous page*

|    |           |       |                                                                                                   |       |
|----|-----------|-------|---------------------------------------------------------------------------------------------------|-------|
| 13 | Lunch     | 23478 | Beef, ground, 97% lean meat / 3% fat, patty, cooked, broiled (28.3)                               | 99.05 |
| 13 | Lunch     | 20037 | Rice, brown, long-grain, cooked (101)                                                             | 202   |
| 13 | Lunch     | 11053 | Beans, snap, green, cooked, boiled, drained, without salt (125)                                   | 62.5  |
| 13 | Lunch     | 16028 | Beans, kidney, all types, mature seeds, cooked, boiled, without salt (177)                        | 88.5  |
| 13 | Lunch     | 11510 | Sweet potato, cooked, boiled, without skin, mashed (328)                                          | 246   |
| 13 | Lunch     | 4053  | Oil, olive, salad or cooking                                                                      | 13.5  |
| 13 | Dinner    | 7933  | Chicken breast, oven-roasted, fat-free, sliced (28.3)                                             | 84.9  |
| 13 | Dinner    | 20125 | Pasta, whole-wheat, cooked , spaghetti packed (75.5)                                              | 226.5 |
| 13 | Dinner    | 1032  | Cheese, parmesan, grated (42.5)                                                                   | 28.35 |
| 13 | Dinner    | 11529 | Tomatoes, red, ripe, raw, year round average, 1 large whole (3" diameter) (123)                   | 61.5  |
| 13 | Dinner    | 4053  | Oil, olive, salad or cooking                                                                      | 13.5  |
| 13 | Dinner    | 11313 | Peas, green, frozen, cooked, boiled, drained, without salt (80)                                   | 20    |
| 13 | Dinner    | 9252  | Pears, raw, slices (140)                                                                          | 140   |
| 13 | Snacks    | 9316  | Strawberries, raw, sliced (166)                                                                   | 83    |
| 13 | Snacks    | 18235 | Crackers, whole-wheat, 5 crackers (23)                                                            | 23    |
| 13 | Water     | 14555 | Water, bottled, generic                                                                           | 2000  |
| 14 | Breakfast | 18061 | Bread, rye, toasted, regular slice (24)                                                           | 48    |
| 14 | Breakfast | 15209 | Fish, salmon, Atlantic, wild, cooked, dry heat                                                    | 42.45 |
| 14 | Breakfast | 1131  | Egg, whole, cooked, poached (1 large) (50)                                                        | 50    |
| 14 | Breakfast | 9210  | Orange juice, chilled, includes from concentrate, with added calcium and vitamin D (249)          | 249   |
| 14 | Lunch     | 20029 | Couscous, cooked (78.5)                                                                           | 157.6 |
| 14 | Lunch     | 7933  | Chicken breast, oven-roasted, fat-free, sliced (28.3)                                             | 56.5  |
| 14 | Lunch     | 11821 | Peppers, sweet, red, raw, chopped (149)                                                           | 41    |
| 14 | Lunch     | 11529 | Tomatoes, red, ripe, raw, year round average, 1 large whole (3" diameter) (123)                   | 61.5  |
| 14 | Lunch     | 11168 | Corn, sweet, yellow, cooked, boiled, drained, without salt, 1 ear large (7-3/4" to 9" long) (118) | 88.5  |
| 14 | Lunch     | 11283 | Onions, cooked, boiled, drained, without salt (210)                                               | 52.5  |

*continued on next page*

*continued from previous page*

|    |        |       |                                                                                        |       |
|----|--------|-------|----------------------------------------------------------------------------------------|-------|
| 14 | Lunch  | 9195  | Olives, pickled, canned or bottled, green, 1 olive                                     | 16.2  |
| 14 | Dinner | 10011 | Pork, fresh, leg (ham), whole, separable lean only, cooked, roasted (28.3)             | 56.6  |
| 14 | Dinner | 11091 | Broccoli, cooked, boiled, drained, without salt, chopped (156)                         | 39    |
| 14 | Dinner | 9278  | Plantains, cooked, sliced (154)                                                        | 77    |
| 14 | Dinner | 20037 | Rice, brown, long-grain, cooked (101)                                                  | 202   |
| 14 | Dinner | 4053  | Oil, olive, salad or cooking                                                           | 20.25 |
| 14 | Dinner | 1082  | Milk, lowfat, fluid, 1% milkfat, with added vitamin A and vitamin D (244)              | 122   |
| 14 | Dinner | 9003  | Apple, raw, with skin, 1 small small (2-3/4" diameter) (149)                           | 149   |
| 14 | Snacks | 9298  | Raisins, seedless, packed (82.5)                                                       | 41.25 |
| 14 | Snacks | 9302  | Raspberries, raw (120)                                                                 | 120   |
| 14 | Snacks | 1220  | Yogurt, vanilla, low fat, 11 grams protein per 8 ounce, fortified with vitamin D (245) | 245   |
| 14 | Snacks | 1082  | Milk, lowfat, fluid, 1% milkfat, with added vitamin A and vitamin D (244)              | 244   |
| 14 | Water  | 14555 | Water, bottled, generic                                                                | 2000  |

## Mexican-style menu plan

| Day | Meal      | Usda  | Item                                                                                | Grams |
|-----|-----------|-------|-------------------------------------------------------------------------------------|-------|
| 1   | Breakfast | 14209 | Beverages, coffee, brewed, prepared with tap water                                  | 180   |
|     |           | 08402 | Cereals, Quick Oats, Dry                                                            | 60    |
|     |           | 01175 | Milk, fluid, 1% fat, without added vitamin A and vitamin D                          | 240   |
|     |           | 09226 | Papayas, raw                                                                        | 145   |
|     | Lunch     | 11091 | Broccoli, cooked, boiled, drained, without salt                                     | 78    |
|     |           | 16057 | Chickpeas (garbanzo beans, bengal gram), mature seeds, cooked, boiled, without salt | 100   |
|     |           | 11210 | Eggplant, cooked, boiled, drained, without salt                                     | 75    |
|     |           | 15261 | Fish, tilapia, raw                                                                  | 90    |

*continued on next page*



*continued from previous page*

|          |                  |       |                                                                |     |
|----------|------------------|-------|----------------------------------------------------------------|-----|
|          |                  | 04053 | Oil, olive, salad or cooking                                   | 10  |
|          |                  | 20451 | Rice, white, medium-grain, cooked, unenriched                  | 90  |
|          |                  | 18363 | Tortillas, ready-to-bake or -fry, corn                         | 30  |
|          | <b>Dinner</b>    | 11967 | Cauliflower, green, cooked, no salt added                      | 95  |
|          |                  | 07961 | Chicken breast, deli, rotisserie seasoned, sliced, prepackaged | 75  |
|          |                  | 04053 | Oil, olive, salad or cooking                                   | 10  |
|          |                  | 09206 | Orange juice, raw                                              | 160 |
|          |                  | 11364 | Potatoes, baked, skin, without salt                            | 140 |
|          | <b>Snack</b>     | 08144 | Cereals, whole wheat hot natural cereal, dry                   | 25  |
|          |                  | 09316 | Strawberries, raw                                              | 160 |
|          |                  | 01116 | Yogurt, plain, whole milk, 8 grams protein per 8 ounce         | 180 |
|          |                  | 12061 | Nuts, almonds                                                  | 12  |
|          |                  | 09252 | Pears, raw                                                     | 95  |
|          | <b>Breakfast</b> | 14209 | Beverages, coffee, brewed, prepared with tap water             | 100 |
| <b>2</b> |                  | 18967 | Bread, white wheat                                             | 60  |
|          |                  | 43344 | Jams, preserves, marmalade, reduced sugar                      | 30  |
|          |                  | 09148 | Kiwifruit, green, raw                                          | 115 |
|          |                  | 01175 | Milk, fluid, 1% fat, without added vitamin A and vitamin D     | 240 |
|          | <b>Lunch</b>     | 23220 | Beef, ground, unspecified fat content, cooked                  | 80  |
|          |                  | 11124 | Carrots, raw                                                   | 55  |
|          |                  | 16370 | Lentils, mature seeds, cooked, boiled, with salt               | 100 |
|          |                  | 04053 | Oil, olive, salad or cooking                                   | 15  |
|          |                  | 20447 | Rice, white, long-grain, parboiled, unenriched, cooked         | 100 |
|          |                  | 11695 | Tomatoes, orange, raw                                          | 60  |
|          | <b>Dinner</b>    | 07961 | Chicken breast, deli, rotisserie seasoned, sliced, prepackaged | 25  |
|          |                  | 11908 | Corn, sweet, white, canned, vacuum pack, regular pack          | 20  |

*continued on next page*

*continued from previous page*

|          |                  |       |                                                                   |     |
|----------|------------------|-------|-------------------------------------------------------------------|-----|
|          |                  | 16173 | Frijoles rojos volteados (Refried beans, red, canned)             | 75  |
|          |                  | 11253 | Lettuce, green leaf, raw                                          | 70  |
|          |                  | 04053 | Oil, olive, salad or cooking                                      | 10  |
|          |                  | 11695 | Tomatoes, orange, raw                                             | 90  |
|          |                  | 28295 | Tortillas, ready-to-bake or -fry, whole wheat                     | 30  |
|          | <b>Snacks</b>    | 09050 | Blueberries, raw                                                  | 100 |
|          |                  | 01116 | Yogurt, plain, whole milk, 8 grams protein per 8 ounce            | 180 |
|          |                  | 18065 | Bread, wheat, toasted                                             | 60  |
|          |                  | 01036 | Cheese, ricotta, whole milk                                       | 60  |
|          |                  | 09206 | Orange juice, raw                                                 | 80  |
|          | <b>Breakfast</b> | 14209 | Beverages, coffee, brewed, prepared with tap water                | 100 |
|          |                  | 28397 | Bread, multi-grain (includes whole-grain)                         | 75  |
| <b>3</b> |                  | 01132 | Egg, whole, cooked, scrambled                                     | 100 |
|          |                  | 09181 | Melons, cantaloupe, raw                                           | 160 |
|          |                  | 01211 | Milk, whole, 3.25% milkfat, without added vitamin A and vitamin D | 240 |
|          | <b>Lunch</b>     | 11210 | Eggplant, cooked, boiled, drained, without salt                   | 75  |
|          |                  | 04053 | Oil, olive, salad or cooking                                      | 15  |
|          |                  | 11283 | Onions, cooked, boiled, drained, without salt                     | 25  |
|          |                  | 20421 | Pasta, cooked, unenriched, without added salt                     | 120 |
|          |                  | 11477 | Squash, summer, zucchini, includes skin, raw                      | 50  |
|          |                  | 09221 | Tangerine juice, raw                                              | 160 |
|          | <b>Dinner</b>    | 11080 | Beets, raw                                                        | 25  |
|          |                  | 16370 | Lentils, mature seeds, cooked, boiled, with salt                  | 200 |
|          |                  | 11251 | Lettuce, cos or romaine, raw                                      | 45  |
|          |                  | 04053 | Oil, olive, salad or cooking                                      | 10  |
|          |                  | 20451 | Rice, white, medium-grain, cooked, unenriched                     | 100 |

*continued on next page*

*continued from previous page*

|          |                  |       |                                                                                     |     |
|----------|------------------|-------|-------------------------------------------------------------------------------------|-----|
|          | <b>Snacks</b>    | 09040 | Bananas, raw                                                                        | 90  |
|          |                  | 01211 | Milk, whole, 3.25% milkfat, without added vitamin A and vitamin D                   | 240 |
|          |                  | 20038 | Oats                                                                                | 30  |
|          |                  | 11974 | Grape leaves, raw                                                                   | 90  |
|          | <b>Breakfast</b> | 08120 | Cereals, oats, regular and quick, not fortified, dry                                | 30  |
|          |                  | 01211 | Milk, whole, 3.25% milkfat, without added vitamin A and vitamin D                   | 240 |
|          |                  | 12142 | Nuts, pecans                                                                        | 15  |
| <b>4</b> |                  | 09316 | Strawberries, raw                                                                   | 100 |
|          | <b>Lunch</b>     | 09037 | Avocados, raw, all commercial varieties                                             | 50  |
|          |                  | 01009 | Cheese, cheddar                                                                     | 20  |
|          |                  | 07961 | Chicken breast, deli, rotisserie seasoned, sliced, prepackaged                      | 35  |
|          |                  | 16173 | Frijoles rojos volteados (Refried beans, red, canned)                               | 80  |
|          |                  | 11260 | Mushrooms, white, raw                                                               | 100 |
|          |                  | 11282 | Onions, raw                                                                         | 25  |
|          |                  | 09429 | Pineapple, raw, traditional varieties                                               | 125 |
|          |                  | 06164 | Sauce, salsa, ready-to-serve                                                        | 30  |
|          |                  | 11695 | Tomatoes, orange, raw                                                               | 50  |
|          |                  | 18363 | Tortillas, ready-to-bake or -fry, corn                                              | 120 |
|          | <b>Dinner</b>    | 16057 | Chickpeas (garbanzo beans, bengal gram), mature seeds, cooked, boiled, without salt | 82  |
|          |                  | 11205 | Cucumber, with peel, raw                                                            | 65  |
|          |                  | 01129 | Egg, whole, cooked, hard-boiled                                                     | 50  |
|          |                  | 15185 | Fish, tuna, white, canned in oil, without salt, drained solids                      | 30  |
|          |                  | 11252 | Lettuce, iceberg (includes crisphead types), raw                                    | 70  |
|          |                  | 09176 | Mangos, raw                                                                         | 160 |
|          |                  | 04053 | Oil, olive, salad or cooking                                                        | 15  |
|          | <b>Snacks</b>    | 09252 | Pears, raw                                                                          | 95  |

*continued on next page*

*continued from previous page*

|          |                  |       |                                                                                       |     |
|----------|------------------|-------|---------------------------------------------------------------------------------------|-----|
|          |                  | 14209 | Beverages, coffee, brewed, prepared with tap water                                    | 100 |
|          |                  | 18065 | Bread, wheat, toasted                                                                 | 50  |
|          |                  | 01211 | Milk, whole, 3.25% milkfat, without added vitamin A and vitamin D                     | 240 |
|          | <b>Breakfast</b> | 14209 | Beverages, coffee, brewed, prepared with tap water                                    | 100 |
|          |                  | 18967 | Bread, white wheat                                                                    | 50  |
|          |                  | 01211 | Milk, whole, 3.25% milkfat, without added vitamin A and vitamin D                     | 240 |
|          |                  | 09226 | Papayas, raw                                                                          | 140 |
| <b>5</b> | <b>Lunch</b>     | 11052 | Beans, snap, green, raw                                                               | 90  |
|          |                  | 11125 | Carrots, cooked, boiled, drained, without salt                                        | 80  |
|          |                  | 15261 | Fish, tilapia, raw                                                                    | 75  |
|          |                  | 09176 | Mangos, raw                                                                           | 165 |
|          |                  | 04053 | Oil, olive, salad or cooking                                                          | 10  |
|          |                  | 31036 | Potatoes, mashed, ready-to-eat                                                        | 105 |
|          | <b>Dinner</b>    | 16370 | Lentils, mature seeds, cooked, boiled, with salt                                      | 100 |
|          |                  | 04053 | Oil, olive, salad or cooking                                                          | 10  |
|          |                  | 10201 | Pork, fresh, loin, center rib (chops), boneless, separable lean only, cooked, broiled | 50  |
|          |                  | 11429 | Radishes, raw                                                                         | 130 |
|          |                  | 20451 | Rice, white, medium-grain, cooked, unenriched                                         | 90  |
|          |                  | 11603 | Yambean (jicama), raw                                                                 | 60  |
|          | <b>snacks</b>    | 08402 | Cereals, Quick Oats, Dry                                                              | 30  |
|          |                  | 09089 | Figs, raw                                                                             | 80  |
|          |                  | 12006 | Seeds, chia seeds, dried                                                              | 12  |
|          |                  | 01116 | Yogurt, plain, whole milk, 8 grams protein per 8 ounce                                | 170 |
|          |                  | 18065 | Bread, wheat, toasted                                                                 | 50  |
|          |                  | 01228 | Cheese, fresh, queso fresco                                                           | 40  |
|          |                  | 09206 | Orange juice, raw                                                                     | 160 |

*continued on next page*

*continued from previous page*

|          |                  |       |                                                                   |     |
|----------|------------------|-------|-------------------------------------------------------------------|-----|
|          | <b>Breakfast</b> | 18967 | Bread, white wheat                                                | 50  |
|          |                  | 43344 | Jams, preserves, marmalade, reduced sugar                         | 30  |
|          |                  | 01211 | Milk, whole, 3.25% milkfat, without added vitamin A and vitamin D | 240 |
|          |                  | 09266 | Pineapple, raw, all varieties                                     | 124 |
|          | <b>Lunch</b>     | 16005 | Beans, baked, home prepared                                       | 180 |
| <b>6</b> |                  | 18065 | Bread, wheat, toasted                                             | 60  |
|          |                  | 01009 | Cheese, cheddar                                                   | 30  |
|          |                  | 04053 | Oil, olive, salad or cooking                                      | 10  |
|          |                  | 11695 | Tomatoes, orange, raw                                             | 100 |
|          | <b>Dinner</b>    | 11125 | Carrots, cooked, boiled, drained, without salt                    | 70  |
|          |                  | 04053 | Oil, olive, salad or cooking                                      | 5   |
|          |                  | 20421 | Pasta, cooked, unenriched, without added salt                     | 120 |
|          |                  | 06194 | Soup, chicken broth, ready-to-serve                               | 240 |
|          |                  | 11695 | Tomatoes, orange, raw                                             | 100 |
|          |                  | 18363 | Tortillas, ready-to-bake or -fry, corn                            | 60  |
|          | <b>Snacks</b>    | 09040 | Bananas, raw                                                      | 80  |
|          |                  | 12142 | Nuts, pecans                                                      | 10  |
|          |                  | 09148 | Kiwifruit, green, raw                                             | 130 |
|          |                  | 01116 | Yogurt, plain, whole milk, 8 grams protein per 8 ounce            | 180 |
|          | <b>Breakfast</b> | 18955 | Bread, pan dulce, sweet yeast bread                               | 40  |
|          |                  | 01175 | Milk, fluid, 1% fat, without added vitamin A and vitamin D        | 200 |
|          |                  | 09316 | Strawberries, raw                                                 | 200 |
|          |                  | 01228 | Cheese, fresh, queso fresco                                       | 10  |
|          |                  | 09152 | Lemon juice, raw                                                  | 180 |
|          |                  | 11263 | Mushrooms, white, stir-fried                                      | 30  |
| <b>7</b> |                  | 18970 | Tortillas, ready-to-bake or -fry, flour, shelf stable             | 30  |

*continued on next page*

*continued from previous page*

|  |               |       |                                                                           |     |
|--|---------------|-------|---------------------------------------------------------------------------|-----|
|  | <b>Lunch</b>  | 11052 | Beans, snap, green, raw                                                   | 115 |
|  |               | 23220 | Beef, ground, unspecified fat content, cooked                             | 50  |
|  |               | 11136 | Cauliflower, cooked, boiled, drained, without salt                        | 95  |
|  |               | 04053 | Oil, olive, salad or cooking                                              | 10  |
|  |               | 09203 | Oranges, raw, Florida                                                     | 240 |
|  |               | 20451 | Rice, white, medium-grain, cooked, unenriched                             | 110 |
|  | <b>Dinner</b> | 01132 | Egg, whole, cooked, scrambled                                             | 40  |
|  |               | 11251 | Lettuce, cos or romaine, raw                                              | 55  |
|  |               | 04053 | Oil, olive, salad or cooking                                              | 10  |
|  |               | 11367 | Potatoes, boiled, cooked without skin, flesh, without salt                | 90  |
|  |               | 11458 | Spinach, cooked, boiled, drained, without salt                            | 100 |
|  |               | 11695 | Tomatoes, orange, raw                                                     | 50  |
|  |               | 28295 | Tortillas, ready-to-bake or -fry, whole wheat                             | 20  |
|  | <b>Snacks</b> | 09176 | Mangos, raw                                                               | 170 |
|  |               | 12006 | Seeds, chia seeds, dried                                                  | 10  |
|  |               | 01231 | Yogurt, vanilla flavor, lowfat milk, sweetened with low calorie sweetener | 150 |
|  |               | 09039 | Avocados, raw, Florida                                                    | 60  |
|  |               | 11091 | Broccoli, cooked, boiled, drained, without salt                           | 25  |
|  |               | 11695 | Tomatoes, orange, raw                                                     | 25  |
|  |               | 18363 | Tortillas, ready-to-bake or -fry, corn                                    | 30  |
|  |               |       |                                                                           |     |
|  |               |       |                                                                           |     |
|  |               |       |                                                                           |     |
|  |               |       |                                                                           |     |
|  |               |       |                                                                           |     |
|  |               |       |                                                                           |     |
|  |               |       |                                                                           |     |

## US-style menu plan

| Day | Meal      | Usda  | Item                                                                                 | Grams |
|-----|-----------|-------|--------------------------------------------------------------------------------------|-------|
| 1   | Breakfast | 18076 | Bread, whole-wheat, commercially prepared, toasted, 1 slice, (25)                    | 50    |
|     |           | 4631  | Margarine-like, vegetable oil spread, fat-free, tub (14.6) (0.44)                    | 14.6  |
|     |           | 1132  | Egg, whole, cooked, scrambled (61)                                                   | 61    |
|     |           | 9206  | Orange juice, raw (248)                                                              | 248   |
|     | Lunch     | 18449 | Tortillas, ready-to-bake or -fry, corn, without added salt (approx 6" diameter) (26) | 26    |
|     |           | 11251 | Lettuce, cos or romaine, raw, shredded (94)                                          | 23.5  |
|     |           | 16015 | Beans, black, mature seeds, cooked, boiled, without salt (172)                       | 86    |
|     |           | 11517 | Sweet potato, frozen, cooked, baked, without salt, cubes (176)                       | 88    |
|     |           | 11529 | Tomatoes, red, ripe, raw, year round average, cherry tomatoes (149)                  | 74.5  |
|     |           | 11821 | Peppers, sweet, red, raw, chopped                                                    | 37.25 |
|     |           | 27063 | Sauce, enchilada, red, mild, ready to serve (1 cup) (224g)                           | 56    |
|     |           | 1168  | Cheese, low fat, cheddar or colby                                                    | 21.25 |
|     |           | 1235  | Yogurt, frozen, flavors not chocolate, nonfat milk, with low-calorie sweetener (136) | 136   |
|     | Dinner    | 4053  | Oil, olive, salad or cooking                                                         | 13.5  |
|     |           | 15047 | Fish, mackerel, Atlantic, cooked, dry heat, (28.3)                                   | 84.9  |
|     |           | 20037 | Rice, brown, long-grain, cooked                                                      | 151.5 |
|     |           | 11305 | Peas, green, cooked, boiled, drained, without salt (160)                             | 80    |
|     |           | 16028 | Beans, kidney, all types, mature seeds, cooked, boiled, without salt (177)           | 44.25 |

*continued on next page*

*continued from previous page*

|   |           |       |                                                                                                                   |        |
|---|-----------|-------|-------------------------------------------------------------------------------------------------------------------|--------|
|   |           | 1085  | Milk, nonfat, fluid, with added vitamin A and vitamin D (fat free or skim) (245)                                  | 245    |
|   |           | 9096  | Fruit cocktail, (peach and pineapple and pear and grape and cherry), canned, water pack, solids and liquids (237) | 237    |
|   | Snack     | 18216 | Crackers, crispbread, rye, 2 crispbread (20)                                                                      | 30     |
|   |           | 16158 | Hummus, commercial                                                                                                | 15     |
|   |           | 11124 | Carrots, raw, strips or slices (122)                                                                              | 61     |
|   |           | 1085  | Milk, nonfat, fluid, with added vitamin A and vitamin D (fat free or skim) (245)                                  | 245    |
| 2 | Breakfast | 8123  | Cereals, oats, instant, fortified, plain, prepared with water (boiling water added or microwaved) (117)           | 175.5  |
|   |           | 1085  | Milk, nonfat, fluid, with added vitamin A and vitamin D (fat free or skim) (245)                                  | 245    |
|   |           | 9040  | Bananas, raw, sliced (150)                                                                                        | 150    |
|   |           | 1129  | Egg, whole, cooked, hard-boiled, 1 large egg                                                                      | 50     |
|   |           | 1129  | Egg, whole, cooked, hard-boiled, 1 large egg                                                                      | 50     |
|   | Lunch     | 18449 | Tortillas, ready-to-bake or -fry, corn, without added salt (approx 6" diameter) (26)                              | 26     |
|   |           | 7933  | Chicken breast, oven-roasted, fat-free, sliced (28.3)                                                             | 42.45  |
|   |           | 11251 | Lettuce, cos or romaine, raw, shredded (94)                                                                       | 23.5   |
|   |           | 11529 | Tomatoes, red, ripe, raw, year round average, 1 large whole (3" diameter) (123)                                   | 30.75  |
|   |           | 1168  | Cheese, low fat, cheddar or colby, shredded (37.7)                                                                | 10.625 |
|   |           | 43355 | Mayonnaise, low sodium, low calorie or diet                                                                       | 14     |
|   |           | 16229 | Soymilk (All flavors), lowfat, with added calcium, vitamins A and D (243)                                         | 121.5  |
|   | Dinner    | 16070 | Lentils, mature seeds, cooked, boiled, without salt                                                               | 49.59  |
|   |           | 20137 | Quinoa, cooked                                                                                                    | 185    |
|   |           | 15137 | Crustaceans, crab, alaska king, cooked, moist heat                                                                | 56.6   |

*continued on next page*



*continued from previous page*

|   |           |       |                                                                                     |       |
|---|-----------|-------|-------------------------------------------------------------------------------------|-------|
|   |           | 11305 | Peas, green, cooked, boiled, drained, without salt (160)                            | 80    |
|   |           | 16057 | Chickpeas (garbanzo beans, bengal gram), mature seeds, cooked, boiled, without salt | 82    |
|   |           | 11885 | Tomatoes, red, ripe, canned, packed in tomato juice, no salt added                  | 120   |
|   |           | 11821 | Peppers, sweet, red, raw, 1 Large, approx 3-3/4" long, 3" diameter                  | 82    |
|   |           | 4053  | Oil, olive, salad or cooking                                                        | 13.5  |
|   |           | 9266  | Pineapple, raw, all varieties, chunks (165)                                         | 82.5  |
|   | Snacks    | 1256  | Yogurt, Greek, plain, nonfat (170)                                                  | 170   |
|   |           | 9316  | Strawberries, raw, sliced (166)                                                     | 83    |
|   |           | 18429 | Crackers, whole-wheat, low salt, 5 crackers (20)                                    | 30    |
|   |           | 1019  | Cheese, feta, crumbled (150)                                                        | 37.5  |
|   |           | 9195  | Olives, pickled, canned or bottled, green, 1 olive (2.7g ) (0.41g oil)              | 10.8  |
| 3 | Breakfast | 18267 | English muffins, whole-wheat, 1/2 english muffin toasted                            | 61    |
|   |           | 1132  | Egg, whole, cooked, scrambled (61)                                                  | 61    |
|   |           | 1132  | Egg, whole, cooked, scrambled (61)                                                  | 61    |
|   |           | 43449 | Beans, baked, canned, no salt added (253)                                           | 126.5 |
|   |           | 1085  | Milk, nonfat, fluid, with added vitamin A and vitamin D (fat free or skim) (245)    | 122.5 |
|   | Lunch     | 7933  | Chicken breast, oven-roasted, fat-free, sliced (28.3)                               | 70.75 |
|   |           | 20037 | Rice, brown, long-grain, cooked                                                     | 151.5 |
|   |           | 11053 | Beans, snap, green, cooked, boiled, drained, without salt (125)                     | 62.5  |
|   |           | 11125 | Carrots, cooked, boiled, drained, without salt (156)                                | 39    |
|   |           | 11305 | Peas, green, cooked, boiled, drained, without salt (160)                            | 80    |
|   |           | 9252  | Pears, raw, 1 medium (178)                                                          | 178   |

*continued on next page*

*continued from previous page*

|   |           |       |                                                                                        |        |
|---|-----------|-------|----------------------------------------------------------------------------------------|--------|
|   | Dinner    | 23478 | Beef, ground, 97% lean meat / 3% fat, patty, cooked, broiled (28.3)                    | 56.6   |
|   |           | 4053  | Oil, olive, salad or cooking                                                           | 13.5   |
|   |           | 11283 | Onions, cooked, boiled, drained, without salt (210)                                    | 52.5   |
|   |           | 11547 | Tomato products, canned, puree, without salt added (250)                               | 62.5   |
|   |           | 20125 | Pasta, whole-wheat, cooked , spaghetti not packed (58.5)                               | 87.75  |
|   |           | 11125 | Carrots, cooked, boiled, drained, without salt (156)                                   | 39     |
|   |           | 1168  | Cheese, low fat, cheddar or colby, shredded (37.7)                                     | 18.85  |
|   |           | 1085  | Milk, nonfat, fluid, with added vitamin A and vitamin D (fat free or skim) (245)       | 245    |
|   | Snacks    | 18429 | Crackers, whole-wheat, low salt, 5 crackers (20)                                       | 20     |
|   |           | 16158 | Hummus, commercial                                                                     | 15     |
|   |           | 1220  | Yogurt, vanilla, low fat, 11 grams protein per 8 ounce, fortified with vitamin D (245) | 245    |
|   |           | 9040  | Bananas, raw, 1 large (8" to 8-7/8" long) (136)                                        | 136    |
| 4 | Breakfast | 9037  | Avocados, raw, all commercial varieties, sliced (146)                                  | 73     |
|   |           | 18061 | Bread, rye, toasted, regular slice (24)                                                | 48     |
|   |           | 1168  | Cheese, low fat, cheddar or colby (42.5)                                               | 10.625 |
|   |           | 1131  | Egg, whole, cooked, poached (1 large) (50)                                             | 50     |
|   |           | 1131  | Egg, whole, cooked, poached (1 large) (50)                                             | 50     |
|   |           | 9206  | Orange juice, raw (248)                                                                | 248    |
|   | Lunch     | 7933  | Chicken breast, oven-roasted, fat-free, sliced (28.3)                                  | 42.45  |
|   |           | 20029 | Couscous, cooked (78.5)                                                                | 78.5   |
|   |           | 11457 | Spinach,raw (60)                                                                       | 15     |
|   |           | 11124 | Carrots, raw, grated (110)                                                             | 27.5   |
|   |           | 11091 | Broccoli, cooked, boiled, drained, without salt, chopped (156)                         | 39     |
|   |           | 11179 | Corn, sweet, yellow, frozen, kernels cut off cob, boiled, drained, without salt (165)  | 41.25  |

*continued on next page*

*continued from previous page*

|   |           |       |                                                                                        |        |
|---|-----------|-------|----------------------------------------------------------------------------------------|--------|
|   |           | 11206 | Cucumber, peeled, raw,sliced (119)                                                     | 29.75  |
|   |           | 9266  | Pineapple, raw, all varieties, chunks (165)                                            | 82.5   |
|   | Dinner    | 15086 | Fish, salmon, sockeye, cooked, dry heat, (28.3)                                        | 84.9   |
|   |           | 20037 | Rice, brown, long-grain, cooked (101)                                                  | 151.5  |
|   |           | 11012 | Asparagus, cooked, boiled, drained (180)                                               | 45     |
|   |           | 11821 | Peppers, sweet, red, raw, chopped (149)                                                | 37.25  |
|   |           | 11283 | Onions, cooked, boiled, drained, without salt (210)                                    | 52.5   |
|   |           | 1243  | Fat free ice cream, no sugar added, flavors other than chocolate (204)                 | 204    |
|   |           | 9326  | Watermelon, raw, diced (152)                                                           | 76     |
|   | Snacks    | 19806 | Snacks, popcorn, air-popped (Unsalted) (24)                                            | 36     |
|   |           | 1085  | Milk, nonfat, fluid, with added vitamin A and vitamin D (fat free or skim) (245)       | 306.25 |
|   |           | 9003  | Apple, raw, with skin, 1 small small (2-3/4" diameter) (149)                           | 149    |
| 5 | Breakfast | 1220  | Yogurt, vanilla, low fat, 11 grams protein per 8 ounce, fortified with vitamin D (245) | 122.5  |
|   |           | 9054  | Blueberries, frozen, unsweetened, unthawed (155)                                       | 38.75  |
|   |           | 9040  | Bananas, raw, sliced (150)                                                             | 75     |
|   |           | 12037 | Seeds, sunflower seed kernels, dry roasted, without salt (14.2)                        | 7.1    |
|   |           | 8122  | Cereals, oats, instant, fortified, plain, dry, 1 packet (28)                           | 28     |
|   |           | 18061 | Bread, rye, toasted, regular slice (24)                                                | 50     |
|   |           | 4631  | Margarine-like, vegetable oil spread, fat-free, tub (14.6) (0.44)                      | 14.6   |
|   | Lunch     | 28397 | Bread, multi-grain (includes whole-grain),1 slice regular (26)                         | 52     |
|   |           | 5168  | Turkey, whole, meat only, cooked, roasted (28.3)                                       | 56.6   |
|   |           | 5168  | Turkey, whole, meat only, cooked, roasted (28.3)                                       | 14.15  |
|   |           | 11251 | Lettuce, cos or romaine, raw, shredded (94)                                            | 23.5   |
|   |           | 11168 | Corn, sweet, yellow, cooked, boiled, drained, without salt, cut (149)                  | 74.5   |

*continued on next page*

*continued from previous page*

|   |           |       |                                                                                                                                             |        |
|---|-----------|-------|---------------------------------------------------------------------------------------------------------------------------------------------|--------|
|   |           | 11529 | Tomatoes, red, ripe, raw, year round average, cherry tomatoes (149)                                                                         | 37.25  |
|   |           | 1168  | Cheese, low fat, cheddar or colby (42.5)                                                                                                    | 10.625 |
|   |           | 43355 | Mayonnaise, low sodium, low calorie or diet                                                                                                 | 14     |
|   |           | 1085  | Milk, nonfat, fluid, with added vitamin A and vitamin D (fat free or skim) (245)                                                            | 306.25 |
|   |           | 9096  | Fruit cocktail, (peach and pineapple and pear and grape and cherry), canned, water pack, solids and liquids (237)                           | 237    |
|   | Dinner    | 20125 | Pasta, whole-wheat, cooked , shells                                                                                                         | 52.5   |
|   |           | 7933  | Chicken breast, oven-roasted, fat-free, sliced (28.3)                                                                                       | 84.9   |
|   |           | 4053  | Oil, olive, salad or cooking                                                                                                                | 13.5   |
|   |           | 13217 | Tomato sauce, canned, no salt added (245)                                                                                                   | 61.25  |
|   |           | 11053 | Beans, snap, green, cooked, boiled, drained, without salt (125)                                                                             | 125    |
|   |           | 11305 | Peas, green, cooked, boiled, drained, without salt (160)                                                                                    | 80     |
|   |           | 1032  | Cheese, parmesan, grated (42.5)                                                                                                             | 10.625 |
|   | snacks    | 9302  | Raspberries, raw (120)                                                                                                                      | 30     |
|   |           | 9040  | Bananas, raw, sliced (150)                                                                                                                  | 150    |
|   |           | 1256  | Yogurt, Greek, plain, nonfat (170)                                                                                                          | 170    |
|   |           | 1085  | Milk, nonfat, fluid, with added vitamin A and vitamin D (fat free or skim) (245)                                                            | 122.5  |
| 6 | Breakfast | 1256  | Yogurt, Greek, plain, nonfat (170)                                                                                                          | 170    |
|   |           | 8037  | Cereals ready-to-eat, granola, homemade (122) Made with oats, raisins, sunflower seeds, almonds, wheat germ, honey, coconut and canola oil. | 61     |
|   |           | 9302  | Raspberries, raw (120)                                                                                                                      | 60     |
|   |           | 18061 | Bread, rye, toasted, regular slice (24)                                                                                                     | 48     |
|   |           | 9040  | Bananas, raw, sliced (150)                                                                                                                  | 150    |
|   | Lunch     | 16015 | Beans, black, mature seeds, cooked, boiled, without salt (43)                                                                               | 43     |

*continued on next page*

*continued from previous page*

|   |           |       |                                                                                                                                                   |       |
|---|-----------|-------|---------------------------------------------------------------------------------------------------------------------------------------------------|-------|
|   |           | 20125 | Pasta, whole-wheat, cooked , penne (48.5)                                                                                                         | 58.4  |
|   |           | 11458 | Spinach, cooked, boiled, drained, without salt (180)                                                                                              | 45    |
|   |           | 11283 | Onions, cooked, boiled, drained, without salt (210)                                                                                               | 52.5  |
|   |           | 11168 | Corn, sweet, yellow, cooked, boiled, drained, without salt, cut (149)                                                                             | 74.5  |
|   |           | 11125 | Carrots, cooked, boiled, drained, without salt (156)                                                                                              | 78    |
|   | Dinner    | 13440 | Beef, loin, tenderloin steak, boneless, separable lean and fat, trimmed to 0" fat, choice, cooked, grilled                                        | 113.2 |
|   |           | 11091 | Broccoli, cooked, boiled, drained, without salt, chopped (156)                                                                                    | 78    |
|   |           | 11371 | Potatoes, mashed, home-prepared, whole milk and margarine added- (Recipe: Potatoes, 80% ; whole milk, 14% ; margarine, 5% ; and salt, 1% .) (210) | 105   |
|   |           | 11283 | Onions, cooked, boiled, drained, without salt (210)                                                                                               | 52.5  |
|   |           | 11261 | Mushrooms, white, cooked, boiled, drained, without salt (156)                                                                                     | 39    |
|   |           | 9286  | Pomegranates, raw (174)                                                                                                                           | 87    |
|   |           | 1243  | Fat free ice cream, no sugar added, flavors other than chocolate (204)                                                                            | 204   |
|   | Snacks    | 18216 | Crackers, crispbread, rye, 2 crispbread (20)                                                                                                      | 30    |
|   |           | 16158 | Hummus, commercial                                                                                                                                | 15    |
|   |           | 1085  | Milk, nonfat, fluid, with added vitamin A and vitamin D (fat free or skim) (245)                                                                  | 245   |
|   |           | 18076 | Bread, whole-wheat, commercially prepared, toasted, 1 slice, (25)                                                                                 | 25    |
|   |           | 4631  | Margarine-like, vegetable oil spread, fat-free, tub (14.6) (0.44)                                                                                 | 14.6  |
| 7 | Breakfast | 8037  | Cereals ready-to-eat, granola, homemade (122) Made with oats, raisins, sunflower seeds, almonds, wheat germ, honey, coconut and canola oil.       | 61    |
|   |           | 1085  | Milk, nonfat, fluid, with added vitamin A and vitamin D (fat free or skim) (245)                                                                  | 122.5 |

*continued on next page*

*continued from previous page*

|  |        |       |                                                                                  |        |
|--|--------|-------|----------------------------------------------------------------------------------|--------|
|  |        | 9302  | Raspberries, raw (120)                                                           | 60     |
|  |        | 9050  | Blueberries, raw (148)                                                           | 74     |
|  |        | 18036 | Bread, multi-grain, toasted (includes whole-grain), 1 slice, (24)                | 48     |
|  | Lunch  | 5168  | Turkey, whole, meat only, cooked, roasted (28.3)                                 | 70.75  |
|  |        | 20029 | Couscous, cooked (78.5)                                                          | 39.25  |
|  |        | 11547 | Tomato products, canned, puree, without salt added (250)                         | 62.5   |
|  |        | 11251 | Lettuce, cos or romaine, raw, shredded (94)                                      | 23.5   |
|  |        | 11821 | Peppers, sweet, red, raw, chopped (149)                                          | 37.25  |
|  |        | 11206 | Cucumber, peeled, raw, sliced (119)                                              | 29.75  |
|  |        | 4635  | Salad dressing, thousand island dressing, fat-free                               | 16     |
|  |        | 1085  | Milk, nonfat, fluid, with added vitamin A and vitamin D (fat free or skim) (245) | 245    |
|  |        | 9003  | Apple, raw, with skin, 1 small (2-3/4" diameter) (149)                           | 149    |
|  | Dinner | 23478 | Beef, ground, 97% lean meat / 3% fat, patty, cooked, broiled (28.3)              | 84.9   |
|  |        | 11805 | Onions, cooked, boiled, drained, with salt (210)                                 | 52.5   |
|  |        | 11125 | Carrots, cooked, boiled, drained, without salt (156)                             | 78     |
|  |        | 11821 | Peppers, sweet, red, raw, chopped (149)                                          | 37.25  |
|  |        | 11305 | Peas, green, cooked, boiled, drained, without salt (160)                         | 80     |
|  |        | 11357 | Potatoes, white, flesh and skin, baked, medium (2-1/4" to 3-1/4" diameter) (173) | 129.75 |
|  |        | 9040  | Bananas, raw, 1 large (8" to 8-7/8" long) (136)                                  | 136    |
|  | Snacks | 18267 | English muffins, whole-wheat, 1/2 english muffin toasted (30.5)                  | 61     |
|  |        | 4631  | Margarine-like, vegetable oil spread, fat-free, tub (14.6) (0.44)                | 14.6   |
|  |        | 16229 | Soy milk (All flavors), lowfat, with added calcium, vitamins A and D (243)       | 243    |

*continued on next page*

*continued from previous page*

|   |           |       |                                                                                                                   |       |
|---|-----------|-------|-------------------------------------------------------------------------------------------------------------------|-------|
|   |           | 18429 | Crackers, whole-wheat, low salt, 5 crackers (20)                                                                  | 10    |
|   |           | 1168  | Cheese, low fat, cheddar or colby (42.5)                                                                          | 21.25 |
|   |           | 19806 | Snacks, popcorn, air-popped (Unsalted) (24)                                                                       | 24    |
| 8 | Breakfast | 8123  | Cereals, oats, instant, fortified, plain, prepared with water (boiling water added or microwaved) (117)           | 175.5 |
|   |           | 1085  | Milk, nonfat, fluid, with added vitamin A and vitamin D (fat free or skim) (245)                                  | 122.5 |
|   |           | 9302  | Raspberries, raw (120)                                                                                            | 30    |
|   |           | 9050  | Blueberries, raw (148)                                                                                            | 37    |
|   |           | 12037 | Seeds, sunflower seed kernels, dry roasted, without salt (14.2)                                                   | 14.2  |
|   |           | 16398 | Peanut butter, smooth style, without salt (16)                                                                    | 8     |
|   |           | 18076 | Bread, whole-wheat, commercially prepared, toasted, 1 slice, (25)                                                 | 50    |
|   |           | 4631  | Margarine-like, vegetable oil spread, fat-free, tub (14.6) (0.44)                                                 | 14.6  |
|   | Lunch     | 18042 | Bread, pita, whole-wheat, 1 small (4" diameter) (28)                                                              | 56    |
|   |           | 11252 | Lettuce, iceberg (includes crisphead types), raw, chopped 1/2" pieces, loosely packed (114)                       | 28.5  |
|   |           | 5168  | Turkey, whole, meat only, cooked, roasted (28.3)                                                                  | 70.75 |
|   |           | 11821 | Peppers, sweet, red, raw, chopped (149)                                                                           | 37.25 |
|   |           | 1168  | Cheese, low fat, cheddar or colby, shredded (37.7)                                                                | 18.85 |
|   |           | 43355 | Mayonnaise, low sodium, low calorie or diet                                                                       | 14    |
|   |           | 11529 | Tomatoes, red, ripe, raw, year round average, cherry tomatoes (149)                                               | 37.25 |
|   |           | 9096  | Fruit cocktail, (peach and pineapple and pear and grape and cherry), canned, water pack, solids and liquids (237) | 237   |
|   | Dinner    | 7933  | Chicken breast, oven-roasted, fat-free, sliced (28.3)                                                             | 42.45 |
|   |           | 20125 | Pasta, whole-wheat, cooked , shells (52.5)                                                                        | 26.25 |
|   |           | 4053  | Oil, olive, salad or cooking                                                                                      | 13.5  |

*continued on next page*

*continued from previous page*

|   |           |       |                                                                                                                      |       |
|---|-----------|-------|----------------------------------------------------------------------------------------------------------------------|-------|
|   |           | 11283 | Onions, cooked, boiled, drained, without salt (210)                                                                  | 52.5  |
|   |           | 11125 | Carrots, cooked, boiled, drained, without salt (156)                                                                 | 39    |
|   |           | 11144 | Celery, cooked, boiled, drained, without salt, diced (150)                                                           | 37.5  |
|   |           | 11305 | Peas, green, cooked, boiled, drained, without salt (160)                                                             | 80    |
|   |           | 11215 | Garlic, raw clove                                                                                                    | 3     |
|   |           | 14555 | Water, bottled, generic,                                                                                             | 474   |
|   |           | 9003  | Apple, raw, with skin, 1 small small (2-3/4" diameter) (149)                                                         | 149   |
|   |           | 11517 | Sweet potato, frozen, cooked, baked, without salt, cubes (176)                                                       | 132   |
|   | Snacks    | 9316  | Strawberries, raw, 8 large (1-3/8" diameter), (144)                                                                  | 72    |
|   |           | 1256  | Yogurt, Greek, plain, nonfat (170)                                                                                   | 170   |
|   |           | 1085  | Milk, nonfat, fluid, with added vitamin A and vitamin D (fat free or skim) (245)                                     | 367.5 |
|   |           | 9040  | Bananas, raw, 1 large (8" to 8-7/8" long) (136)                                                                      | 136   |
| 9 | Breakfast | 1256  | Yogurt, Greek, plain, nonfat (170)                                                                                   | 85    |
|   |           | 9318  | Strawberries, frozen, unsweetened, thawed (221)                                                                      | 110.5 |
|   |           | 9054  | Blueberries, frozen, unsweetened, unthawed (155)                                                                     | 38.75 |
|   |           | 12037 | Seeds, sunflower seed kernels, dry roasted, without salt (14.2)                                                      | 7.1   |
|   |           | 8122  | Cereals, oats, instant, fortified, plain, dry, 1 packet (28)                                                         | 28    |
|   |           | 18061 | Bread, rye, toasted, regular slice (24)                                                                              | 48    |
|   |           | 4631  | Margarine-like, vegetable oil spread, fat-free, tub (14.6) (0.44)                                                    | 14.6  |
|   | Lunch     | 17012 | Lamb, domestic, leg, whole (shank and sirloin), separable lean and fat, trimmed to 1/4" fat, choice, cooked, roasted | 84.9  |
|   |           | 20137 | Quinoa, cooked                                                                                                       | 185   |
|   |           | 16043 | Beans, pinto, mature seeds, cooked, boiled, without salt (171)                                                       | 42.75 |
|   |           | 11821 | Peppers, sweet, red, raw, 1 Large, approx 3-3/4" long, 3" diameter (164)                                             | 82    |

*continued on next page*



*continued from previous page*

|    |           |       |                                                                                     |        |
|----|-----------|-------|-------------------------------------------------------------------------------------|--------|
|    |           | 11529 | Tomatoes, red, ripe, raw, year round average, cherry tomatoes (149)                 | 37.25  |
|    |           | 11234 | Kale, cooked, boiled, drained, without salt (130)                                   | 32.5   |
|    |           | 11283 | Onions, cooked, boiled, drained, without salt (210)                                 | 52.5   |
|    |           | 1019  | Cheese, feta, crumbled                                                              | 37.5   |
|    |           | 4053  | Oil, olive, salad or cooking                                                        | 13.5   |
|    | Dinner    | 20029 | Couscous, cooked                                                                    | 157    |
|    |           | 15116 | Fish, trout, rainbow, wild, cooked, dry heat                                        | 56.6   |
|    |           | 11099 | Brussels sprouts, cooked, boiled, drained, without salt                             | 78     |
|    |           | 11367 | Potatoes, boiled, cooked without skin, flesh, without salt (156)                    | 39     |
|    |           | 16057 | Chickpeas (garbanzo beans, bengal gram), mature seeds, cooked, boiled, without salt | 41     |
|    |           | 4053  | Oil, olive, salad or cooking                                                        | 6.25   |
|    |           | 1243  | Fat free ice cream, no sugar added, flavors other than chocolate                    | 204    |
|    |           | 9236  | Peaches, yellow, raw, Slices                                                        | 77     |
|    | Snacks    | 9206  | Orange juice, raw (248)                                                             | 186    |
|    |           | 1085  | Milk, nonfat, fluid, with added vitamin A and vitamin D (fat free or skim) (245)    | 306.25 |
| 10 | Breakfast | 1256  | Yogurt, Greek, plain, nonfat                                                        | 170    |
|    |           | 8037  | Cereals ready-to-eat, granola, homemade (122)                                       | 61     |
|    |           | 9050  | Blueberries, raw (148)                                                              | 74     |
|    |           | 12037 | Seeds, sunflower seed kernels, dry roasted, without salt (14.2)                     | 7.1    |
|    |           | 18061 | Bread, rye, toasted, regular slice (24)                                             | 48     |
|    |           | 4631  | Margarine-like, vegetable oil spread, fat-free, tub (14.6) (0.44)                   | 14.6   |
|    | Lunch     | 1130  | Egg, whole, cooked, omelet (61)                                                     | 61     |

*continued on next page*

*continued from previous page*

|    |            |       |                                                                                                                   |       |
|----|------------|-------|-------------------------------------------------------------------------------------------------------------------|-------|
|    |            | 11357 | Potatoes, white, flesh and skin, baked, medium (2-1/4" to 3-1/4" diameter) (173)                                  | 173   |
|    |            | 11283 | Onions, cooked, boiled, drained, without salt (210)                                                               | 52.5  |
|    |            | 4053  | Oil, olive, salad or cooking                                                                                      | 13.5  |
|    |            | 11529 | Tomatoes, red, ripe, raw, year round average, cherry tomatoes (149)                                               | 37.25 |
|    |            | 11261 | Mushrooms, white, cooked, boiled, drained, without salt (156)                                                     | 39    |
|    |            | 11457 | Spinach,raw (60)                                                                                                  | 15    |
|    |            | 1168  | Cheese, low fat, cheddar or colby, shredded (37.7)                                                                | 18.85 |
|    |            | 9096  | Fruit cocktail, (peach and pineapple and pear and grape and cherry), canned, water pack, solids and liquids (237) | 237   |
|    | Dinner     | 7933  | Chicken breast, oven-roasted, fat-free, sliced                                                                    | 84.9  |
|    |            | 20137 | Quinoa, cooked                                                                                                    | 185   |
|    |            | 11053 | Beans, snap, green, cooked, boiled, drained, without salt                                                         | 62.5  |
|    |            | 11206 | Cucumber, peeled, raw,sliced                                                                                      | 29.75 |
|    |            | 11032 | Lima beans, immature seeds, cooked, boiled, drained, without salt                                                 | 85    |
|    |            | 11885 | Tomatoes, red, ripe, canned, packed in tomato juice, no salt added (240)                                          | 120   |
|    |            | 1220  | Yogurt, vanilla, low fat, 11 grams protein per 8 ounce, fortified with vitamin D (245)                            | 122.5 |
|    |            | 9302  | Raspberries, raw (120)                                                                                            | 60    |
|    | Snacks     | 18216 | Crackers, crispbread, rye, 2 crispbread (20)                                                                      | 30    |
|    |            | 16158 | Hummus, commercial (2 tbs) (30)                                                                                   | 30    |
|    |            | 1085  | Milk, nonfat, fluid, with added vitamin A and vitamin D (fat free or skim) (245)                                  | 245   |
|    |            | 9003  | Apple, raw, with skin, 1 small small (2-3/4" diameter) (149)                                                      | 149   |
| 11 | Breakfsast | 43449 | Beans, baked, canned, no salt added (253)                                                                         | 126.5 |

*continued on next page*

*continued from previous page*

|    |           |       |                                                                                  |       |
|----|-----------|-------|----------------------------------------------------------------------------------|-------|
|    |           | 18076 | Bread, whole-wheat, commercially prepared, toasted                               | 50    |
|    |           | 9206  | Orange juice, raw (248)                                                          | 248   |
|    | Lunch     | 4053  | Oil, olive, salad or cooking                                                     | 6.25  |
|    |           | 15047 | Fish, mackerel, Atlantic, cooked, dry heat, (28.3)                               | 84.9  |
|    |           | 20037 | Rice, brown, long-grain, cooked                                                  | 151.5 |
|    |           | 11510 | Sweet potato, cooked, boiled, without skin, mashed                               | 164   |
|    |           | 12063 | Nuts, almonds, dry roasted, without salt added (11 whole kernels ) (14.2)        | 7.1   |
|    |           | 9200  | Oranges, raw, all commercial varieties, 1 large (3-1/16" diameter) (184)         | 184   |
|    |           | 1256  | Yogurt, Greek, plain, nonfat (170)                                               | 170   |
|    | Dinner    | 23478 | Beef, ground, 97% lean meat / 3% fat, patty, cooked, broiled (28.3)              | 56.6  |
|    |           | 13217 | Tomato sauce, canned, no salt added (245)                                        | 61.25 |
|    |           | 20125 | Pasta, whole-wheat, cooked , shells (52.5)                                       | 52.5  |
|    |           | 11091 | Broccoli, cooked, boiled, drained, without salt, chopped (156)                   | 39    |
|    |           | 16028 | Beans, kidney, all types, mature seeds, cooked, boiled, without salt (177)       | 88.5  |
|    |           | 1085  | Milk, nonfat, fluid, with added vitamin A and vitamin D (fat free or skim) (245) | 245   |
|    |           | 11168 | Corn, sweet, yellow, cooked, boiled, drained, without salt, cut (149)            | 74.5  |
|    | Snacks    | 18216 | Crackers, crispbread, rye, 2 crispbread (20)                                     | 30    |
|    |           | 1168  | Cheese, low fat, cheddar or colby, shredded (37.7)                               | 18.85 |
|    |           | 16229 | Soymilk (All flavors), lowfat, with added calcium, vitamins A and D (243)        | 121.5 |
| 12 | Breakfast | 1130  | Egg, whole, cooked, omelet (61)                                                  | 61    |
|    |           | 11921 | Peppers, sweet, red, sauteed (106)                                               | 26.5  |

*continued on next page*

*continued from previous page*

|  |        |       |                                                                                                                      |       |
|--|--------|-------|----------------------------------------------------------------------------------------------------------------------|-------|
|  |        | 11529 | Tomatoes, red, ripe, raw, year round average, cherry tomatoes (149)                                                  | 74.5  |
|  |        | 11457 | Spinach,raw                                                                                                          | 15    |
|  |        | 1168  | Cheese, low fat, cheddar or colby, shredded (37.7)                                                                   | 37.7  |
|  |        | 4053  | Oil, olive, salad or cooking                                                                                         | 13.5  |
|  |        | 18061 | Bread, rye, toasted, regular slice (24)                                                                              | 24    |
|  |        | 4631  | Margarine-like, vegetable oil spread, fat-free, tub (14.6) (0.44)                                                    | 14.6  |
|  |        | 1085  | Milk, nonfat, fluid, with added vitamin A and vitamin D (fat free or skim) (245)                                     | 245   |
|  |        | 9206  | Orange juice, raw (248)                                                                                              | 248   |
|  | Lunch  | 11252 | Lettuce, iceberg (includes crisphead types), raw, chopped 1/2" pieces, loosely packed (114)                          | 57    |
|  |        | 11283 | Onions, cooked, boiled, drained, without salt (210)                                                                  | 52.5  |
|  |        | 17012 | Lamb, domestic, leg, whole (shank and sirloin), separable lean and fat, trimmed to 1/4" fat, choice, cooked, roasted | 56.6  |
|  |        | 11206 | Cucumber, peeled, raw,sliced (119)                                                                                   | 29.75 |
|  |        | 11124 | Carrots, raw, grated (110)                                                                                           | 27.5  |
|  |        | 4635  | Salad dressing, thousand island dressing, fat-free                                                                   | 16    |
|  |        | 20029 | Couscous, cooked (78.5)                                                                                              | 157   |
|  |        | 1085  | Milk, nonfat, fluid, with added vitamin A and vitamin D (fat free or skim) (245)                                     | 245   |
|  |        | 9040  | Bananas, raw, 1 large (8" to 8-7/8" long) (136)                                                                      | 136   |
|  | Dinner | 15151 | Crustaceans, shrimp, mixed species, cooked, moist heat (may have been previously frozen)                             | 84.9  |
|  |        | 20125 | Pasta, whole-wheat, cooked , spaghetti not packed (58.5)                                                             | 87.75 |
|  |        | 11458 | Spinach, cooked, boiled, drained, without salt (180)                                                                 | 45    |
|  |        | 4053  | Oil, olive, salad or cooking                                                                                         | 6.75  |
|  |        | 18061 | Bread, rye, toasted, regular slice (24)                                                                              | 24    |

*continued on next page*

*continued from previous page*

|    |           |       |                                                                                                                                                   |       |
|----|-----------|-------|---------------------------------------------------------------------------------------------------------------------------------------------------|-------|
|    |           | 9252  | Pears, raw,1 medium (178)                                                                                                                         | 178   |
|    | Snacks    | 19806 | Snacks, popcorn, air-popped (Unsalted) (24)                                                                                                       | 12    |
|    |           | 1085  | Milk, nonfat, fluid, with added vitamin A and vitamin D (fat free or skim) (245)                                                                  | 245   |
|    |           | 9132  | Grapes,32 red or green (European type, such as Thompson seedless), raw (156.8)                                                                    | 78.4  |
| 13 | Breakfast | 8123  | Cereals, oats, instant, fortified, plain, prepared with water (boiling water added or microwaved) (117)                                           | 175.5 |
|    |           | 1085  | Milk, nonfat, fluid, with added vitamin A and vitamin D (fat free or skim) (245)                                                                  | 245   |
|    |           | 9302  | Raspberries, raw (120)                                                                                                                            | 30    |
|    |           | 9050  | Blueberries, raw (148)                                                                                                                            | 37    |
|    |           | 12037 | Seeds, sunflower seed kernels, dry roasted, without salt (14.2)                                                                                   | 7.1   |
|    | Lunch     | 5168  | Turkey, whole, meat only, cooked, roasted (28.3)                                                                                                  | 56.6  |
|    |           | 11921 | Peppers, sweet, red, sauteed (106)                                                                                                                | 26.5  |
|    |           | 11529 | Tomatoes, red, ripe, raw, year round average, cherry tomatoes (149)                                                                               | 37.25 |
|    |           | 11457 | Spinach,raw                                                                                                                                       | 15    |
|    |           | 11333 | Peppers, sweet, green, raw,1 large (2-1/4 per lb, approx 3-3/4" long, 3" diameter) (164)                                                          | 41    |
|    |           | 4053  | Oil, olive, salad or cooking                                                                                                                      | 6.75  |
|    |           | 20125 | Pasta, whole-wheat, cooked , shells (52.5)                                                                                                        | 52.5  |
|    | dinner    | 23478 | Beef, ground, 97% lean meat / 3% fat, patty, cooked, broiled (28.3)                                                                               | 84.9  |
|    |           | 11091 | Broccoli, cooked, boiled, drained, without salt, chopped (156)                                                                                    | 39    |
|    |           | 11371 | Potatoes, mashed, home-prepared, whole milk and margarine added- (Recipe: Potatoes, 80% ; whole milk, 14% ; margarine, 5% ; and salt, 1% .) (210) | 157.5 |
|    |           | 11283 | Onions, cooked, boiled, drained, without salt (210)                                                                                               | 52.5  |

*continued on next page*

*continued from previous page*

|    |           |       |                                                                                                 |      |
|----|-----------|-------|-------------------------------------------------------------------------------------------------|------|
|    |           | 11261 | Mushrooms, white, cooked, boiled, drained, without salt (156)                                   | 117  |
|    |           | 4053  | Oil, olive, salad or cooking                                                                    | 6.75 |
|    |           | 9286  | Pomegranates, raw (174)                                                                         | 87   |
|    |           | 1243  | Fat free ice cream, no sugar added, flavors other than chocolate (204)                          | 204  |
|    | Snacks    | 18267 | English muffins, whole-wheat, 1/2 english muffin toasted (30.5)                                 | 61   |
|    |           | 18216 | Crackers, crispbread, rye, 2 crispbread (20)                                                    | 30   |
|    |           | 1256  | Yogurt, Greek, plain, nonfat (170)                                                              | 170  |
|    |           | 9316  | Strawberries, raw, 8 large (1-3/8" diameter), (144)                                             | 144  |
|    |           | 9003  | Apple, raw, with skin, 1 small small (2-3/4" diameter) (149)                                    | 149  |
|    |           | 16229 | Soymilk (All flavors), lowfat, with added calcium, vitamins A and D (243)                       | 243  |
| 14 | Breakfast | 9037  | Avocados, raw, all commercial varieties, sliced (146)                                           | 36.5 |
|    |           | 18061 | Bread, rye, toasted, regular slice (24)                                                         | 48   |
|    |           | 1131  | Egg, whole, cooked, poached (1 large) (50)                                                      | 50   |
|    |           | 1131  | Egg, whole, cooked, poached (1 large) (50)                                                      | 50   |
|    |           | 9206  | Orange juice, raw (248)                                                                         | 248  |
|    | Lunch     | 11357 | Potatoes, white, flesh and skin, baked, medium (2-1/4" to 3-1/4" diameter) (173)                | 173  |
|    |           | 7933  | Chicken breast, oven-roasted, fat-free, sliced (28.3)                                           | 56.6 |
|    |           | 11168 | Corn, sweet, yellow, cooked, boiled, drained, without salt, 1 ear small (5-1/2" to 6-1/2" long) | 74.5 |
|    |           | 11251 | Lettuce, cos or romaine, raw                                                                    | 23.5 |
|    |           | 11529 | Tomatoes, red, ripe, raw, year round average, cherry tomatoes                                   | 74.5 |
|    |           | 16229 | Soymilk (All flavors), lowfat, with added calcium, vitamins A and D                             | 243  |

*continued on next page*

*continued from previous page*

|  |        |       |                                                                                  |       |
|--|--------|-------|----------------------------------------------------------------------------------|-------|
|  | Dinner | 23478 | Beef, ground, 97% lean meat / 3% fat, patty, cooked, broiled (28.3)              | 56.6  |
|  |        | 4053  | Oil, olive, salad or cooking                                                     | 13.5  |
|  |        | 11283 | Onions, cooked, boiled, drained, without salt (210)                              | 52.5  |
|  |        | 11547 | Tomato products, canned, puree, without salt added (250)                         | 62.5  |
|  |        | 20125 | Pasta, whole-wheat, cooked , spaghetti not packed (58.5)                         | 87.75 |
|  |        | 11125 | Carrots, cooked, boiled, drained, without salt (156)                             | 39    |
|  |        | 1168  | Cheese, low fat, cheddar or colby, shredded (37.7)                               | 18.85 |
|  |        | 9252  | Pears, raw,1 medium (178)                                                        | 178   |
|  |        | 1256  | Yogurt, Greek, plain, nonfat (170)                                               | 170   |
|  | Snacks | 16158 | Hummus, commercial (2 tbs) (30)                                                  | 15    |
|  |        | 18235 | Crackers, whole-wheat, 5 crackers (23)                                           | 11.5  |
|  |        | 1085  | Milk, nonfat, fluid, with added vitamin A and vitamin D (fat free or skim) (245) | 245   |
|  |        | 18076 | Bread, whole-wheat, commercially prepared, toasted                               | 50    |
|  |        | 1168  | Cheese, low fat, cheddar or colby, shredded (37.7)                               | 18.85 |

## Vegetarian-style menu plan

Table 4: 8

| Day | Meal      | Usda  | Item                                                                             | Grams |
|-----|-----------|-------|----------------------------------------------------------------------------------|-------|
| 1   | Breakfast | 18061 | Bread, rye, toasted, regular slice (24)                                          | 48    |
|     |           | 1129  | Egg, whole, cooked, hard-boiled, 1 large egg (50)                                | 50    |
|     |           | 1168  | Cheese, low fat, cheddar or colby, shredded (37.7)                               | 18.85 |
|     |           | 1085  | Milk, nonfat, fluid, with added vitamin A and vitamin D (fat free or skim) (245) | 122.5 |
|     |           | 9200  | Oranges, raw, all commercial varieties, 2 small (2-3/8" diameter)(96)            | 48    |

*continued on next page*

*continued from previous page*

|   |           |       |                                                                                                                             |        |
|---|-----------|-------|-----------------------------------------------------------------------------------------------------------------------------|--------|
|   | Lunch     | 18076 | Bread, whole-wheat, commercially prepared, toasted, 1 slice, (25)                                                           | 50     |
|   |           | 1168  | Cheese, low fat, cheddar or colby, shredded (37.7)                                                                          | 37.7   |
|   |           | 11529 | Tomatoes, red, ripe, raw, year round average, 1 large whole (3" diameter) (123)                                             | 61.5   |
|   |           | 11179 | Corn, sweet, yellow, frozen, kernels cut off cob, boiled, drained, without salt (165)                                       | 82.5   |
|   |           | 11457 | Spinach,raw                                                                                                                 | 15     |
|   |           | 1085  | Milk, nonfat, fluid, with added vitamin A and vitamin D (fat free or skim) (245)                                            | 245    |
|   |           | 9003  | Apples, raw, with skin, quatered or chopped (red delicious, golden delicious, gala, granny smith, and fuji varieties) (125) | 125    |
|   | Dinner    | 20137 | Quinoa, cooked                                                                                                              | 185    |
|   |           | 16043 | Beans, pinto, mature seeds, cooked, boiled, without salt (171)                                                              | 42.75  |
|   |           | 11821 | Peppers, sweet, red, raw,1 Large, approx 3-3/4" long, 3" diameter (164)                                                     | 74.5   |
|   |           | 11529 | Tomatoes, red, ripe, raw, year round average, cherry tomatoes (149)                                                         | 37.25  |
|   |           | 11234 | Kale, cooked, boiled, drained, without salt (130)                                                                           | 32.5   |
|   |           | 11805 | Onions, cooked, boiled, drained, with salt (210)                                                                            | 52.5   |
|   |           | 1019  | Cheese, feta, ctrumbled                                                                                                     | 37.5   |
|   |           | 4053  | Oil, olive, salad or cooking                                                                                                | 13.5   |
|   |           | 12016 | Seeds, pumpkin and squash seed kernels, roasted, without salt (14.2)                                                        | 14.2   |
|   |           | 9200  | Oranges, raw, all commercial varieties, 2 small (2-3/8" diameter)(96)                                                       | 48     |
|   | Snacks    | 18216 | Crackers, crispbread, rye, 2 crispbread (20)                                                                                | 10     |
|   |           | 16158 | Hummus, commercial (2 tbls) (30)                                                                                            | 15     |
|   |           | 12155 | Nuts, walnuts, english, 7 halves (14.2)                                                                                     | 14.2   |
|   |           | 16229 | Soymilk (All flavors), lowfat, with added calcium, vitamins A and D                                                         | 182.25 |
|   | Water     | 14555 | Water, bottled, generic                                                                                                     | 2000   |
| 2 | Breakfast | 1256  | Yogurt, Greek, plain, nonfat (170)                                                                                          | 170    |
|   |           | 8122  | Cereals, oats, instant, fortified, plain, dry, 1 packet (28)                                                                | 28     |
|   |           | 9050  | Blueberries, raw (148)                                                                                                      | 74     |

*continued on next page*



*continued from previous page*

|  |        |       |                                                                                                                 |       |
|--|--------|-------|-----------------------------------------------------------------------------------------------------------------|-------|
|  |        | 12037 | Seeds, sunflower seed kernels, dry roasted, without salt                                                        | 7.1   |
|  |        | 18076 | Bread, whole-wheat, commercially prepared, toasted, 1 slice, (25)                                               | 50    |
|  |        | 4697  | Margarine-like, vegetable oil spread, 60% fat, stick/tub/bottle, without salt, with added vitamin D (14g) 1 tbs | 7     |
|  |        | 16229 | Soymilk (All flavors), lowfat, with added calcium, vitamins A and D                                             | 121.5 |
|  | Lunch  | 20137 | Quinoa, cooked (92.5)                                                                                           | 92.5  |
|  |        | 16070 | Lentils, mature seeds, cooked, boiled, without salt (49.59)                                                     | 49.5  |
|  |        | 16017 | Beans, black turtle, mature seeds, cooked, boiled, without salt (185)                                           | 46.25 |
|  |        | 11251 | Lettuce, cos or romaine, raw, shredded (94)                                                                     | 47    |
|  |        | 11206 | Cucumber, peeled, raw,sliced (119)                                                                              | 29.75 |
|  |        | 9195  | Olives, pickled, canned or bottled, green, 1 olive (2.7g) ) (0.41g oil)                                         | 10.8  |
|  |        | 4635  | Salad dressing, thousand island dressing, fat-free                                                              | 16    |
|  |        | 9266  | Pineapple, raw, all varieties, chunks (165)                                                                     | 82.5  |
|  | Dinner | 1130  | Egg, whole, cooked, omelet (61)                                                                                 | 61    |
|  |        | 11357 | Potatoes, white, flesh and skin, baked, medium (2-1/4" to 3-1/4" diameter) (173)                                | 86.5  |
|  |        | 11283 | Onions, cooked, boiled, drained, without salt (210)                                                             | 52.5  |
|  |        | 4053  | Oil, olive, salad or cooking                                                                                    | 13.5  |
|  |        | 11529 | Tomatoes, red, ripe, raw, year round average, cherry tomatoes (149)                                             | 37.25 |
|  |        | 11261 | Mushrooms, white, cooked, boiled, drained, without salt (156)                                                   | 39    |
|  |        | 11457 | Spinach,raw (60)                                                                                                | 15    |
|  |        | 1168  | Cheese, low fat, cheddar or colby, shredded (37.7)                                                              | 18.85 |
|  |        | 9097  | Fruit cocktail, (peach and pineapple and pear and grape and cherry), canned, juice pack, solids and liquids     | 237   |
|  | Snacks | 1220  | Yogurt, vanilla, low fat, 11 grams protein per 8 ounce, fortified with vitamin D (245)                          | 245   |
|  |        | 16158 | Hummus, commercial (2 tbs) (30)                                                                                 | 30    |
|  |        | 18429 | Crackers, whole-wheat, low salt, 5 crackers (20)                                                                | 20    |
|  |        | 18036 | Bread, multi-grain, toasted (includes whole-grain), 1 slice, (24)                                               | 24    |

*continued on next page*

*continued from previous page*

|   |           |       |                                                                                                                  |       |
|---|-----------|-------|------------------------------------------------------------------------------------------------------------------|-------|
|   |           | 16398 | Peanut butter, smooth style, without salt (16)                                                                   | 8     |
| 3 | Breakfast | 1130  | Egg, whole, cooked, omelet (61)                                                                                  | 61    |
|   |           | 11478 | Squash, summer, zucchini, includes skin, cooked, boiled, drained, without salt, sliced (180)                     | 45    |
|   |           | 11282 | Onions, raw, chopped (160)                                                                                       | 40    |
|   |           | 11261 | Mushrooms, white, cooked, boiled, drained, without salt (156)                                                    | 39    |
|   |           | 11234 | Kale, cooked, boiled, drained, without salt (130)                                                                | 32.5  |
|   |           | 11821 | Peppers, sweet, red, raw, 1 Large, approx 3-3/4" long, 3" diameter (164)                                         | 37.25 |
|   |           | 11547 | Tomato products, canned, puree, without salt added (250)                                                         | 62.5  |
|   |           | 1168  | Cheese, low fat, cheddar or colby, shredded (37.7)                                                               | 18.85 |
|   |           | 18036 | Bread, multi-grain, toasted (includes whole-grain), 1 slice, (24)                                                | 24    |
|   |           | 4697  | Margarine-like, vegetable oil spread, 60% fat, stick/tub/bottle, without salt, with added vitamin D (14g) 1 tbls | 7     |
|   |           | 9206  | Orange juice, raw (248)                                                                                          | 248   |
|   | Lunch     | 28318 | Bread, french or vienna, whole wheat, 1 slice                                                                    | 96    |
|   |           | 6192  | Split pea soup, canned, reduced sodium, prepared with water or ready-to serve                                    | 126.5 |
|   |           | 9286  | Pomegranates, raw                                                                                                | 43.5  |
|   |           | 9040  | Bananas, raw, sliced (150)                                                                                       | 75    |
|   |           | 1243  | Fat free ice cream, no sugar added, flavors other than chocolate                                                 | 102   |
|   | Dinner    | 20125 | Pasta, whole-wheat, cooked, spaghetti not packed (58.5)                                                          | 117   |
|   |           | 11261 | Mushrooms, white, cooked, boiled, drained, without salt (156)                                                    | 39    |
|   |           | 11179 | Corn, sweet, yellow, frozen, kernels cut off cob, boiled, drained, without salt (165)                            | 82.5  |
|   |           | 11885 | Tomatoes, red, ripe, canned, packed in tomato juice, no salt added (240)                                         | 60    |
|   |           | 11125 | Carrots, cooked, boiled, drained, without salt (156)                                                             | 78    |
|   |           | 1032  | Cheese, parmesan, grated                                                                                         | 21.25 |
|   |           | 1220  | Yogurt, vanilla, low fat, 11 grams protein per 8 ounce, fortified with vitamin D (245)                           | 245   |
|   |           | 9316  | Strawberries, raw, sliced (166)                                                                                  | 41.5  |

*continued on next page*

*continued from previous page*

|   |           |       |                                                                                                         |       |
|---|-----------|-------|---------------------------------------------------------------------------------------------------------|-------|
|   | Snacks    | 18216 | Crackers, crispbread, rye, 2 crispbread (20)                                                            | 20    |
|   |           | 16158 | Hummus, commercial (2 tbs) (30)                                                                         | 15    |
|   |           | 1085  | Milk, nonfat, fluid, with added vitamin A and vitamin D (fat free or skim) (245)                        | 245   |
|   |           | 12155 | Nuts, walnuts, english, 7 halves (14.2)                                                                 | 7.1   |
| 4 | Breakfast | 8123  | Cereals, oats, instant, fortified, plain, prepared with water (boiling water added or microwaved) (117) | 117   |
|   |           | 12037 | Seeds, sunflower seed kernels, dry roasted, without salt (14.2)                                         | 7.1   |
|   |           | 1256  | Yogurt, Greek, plain, nonfat (170)                                                                      | 170   |
|   |           | 9302  | Raspberries, raw (120)                                                                                  | 60    |
|   |           | 18061 | Bread, rye, toasted, regular slice (24)                                                                 | 48    |
|   |           | 9206  | Orange juice, raw (248)                                                                                 | 248   |
|   | Lunch     | 16126 | Tofu, firm, prepared with calcium sulfate and magnesium chloride (nigari) (63)                          | 63    |
|   |           | 11099 | Brussels sprouts, cooked, boiled, drained, without salt (156)                                           | 78    |
|   |           | 20112 | Noodles, egg, spinach, enriched, cooked (80)                                                            | 120   |
|   |           | 4058  | Oil, sesame, salad or cooking                                                                           | 6.8   |
|   |           | 16424 | Soy sauce made from soy and wheat (shoyu), low sodium (1 tbs) 14.2g                                     | 14.2  |
|   |           | 11091 | Broccoli, cooked, boiled, drained, without salt, chopped (156)                                          | 39    |
|   |           | 9326  | Watermelon, raw, diced (152)                                                                            | 76    |
|   | Dinner    | 20029 | Couscous, cooked                                                                                        | 157.6 |
|   |           | 4053  | Oil, olive, salad or cooking                                                                            | 13.5  |
|   |           | 11032 | Lima beans, immature seeds, cooked, boiled, drained, without salt                                       | 85    |
|   |           | 16043 | Beans, pinto, mature seeds, cooked, boiled, without salt (171)                                          | 85.5  |
|   |           | 11529 | Tomatoes, red, ripe, raw, year round average, 1 large whole (3" diameter) (123)                         | 61.5  |
|   |           | 11333 | Peppers, sweet, green, raw, chopped                                                                     | 74.5  |
|   |           | 9195  | Olives, pickled, canned or bottled, green, 1 olive                                                      | 10.8  |
|   |           | 9266  | Pineapple, raw, all varieties, chunks (165)                                                             | 82.5  |

*continued on next page*

*continued from previous page*

|          |           |       |                                                                                                                   |       |
|----------|-----------|-------|-------------------------------------------------------------------------------------------------------------------|-------|
|          | Snacks    | 1085  | Milk, nonfat, fluid, with added vitamin A and vitamin D (fat free or skim) (245)                                  | 490   |
|          |           | 18216 | Crackers, crispbread, rye, 2 crispbread (20)                                                                      | 20    |
| day<br>5 | Breakfast | 1256  | Yogurt, Greek, plain, nonfat (170)                                                                                | 170   |
|          |           | 9318  | Strawberries, frozen, unsweetened, thawed (221)                                                                   | 110.5 |
|          |           | 9054  | Blueberries, frozen, unsweetened, unthawed (155)                                                                  | 38.75 |
|          |           | 12037 | Seeds, sunflower seed kernels, dry roasted, without salt (14.2)                                                   | 7.1   |
|          |           | 8122  | Cereals, oats, instant, fortified, plain, dry, 1 packet (28)                                                      | 28    |
|          |           | 18061 | Bread, rye, toasted, regular slice (24)                                                                           | 48    |
|          |           | 9206  | Orange juice, raw (248)                                                                                           | 248   |
|          | Lunch     | 18076 | Bread, whole-wheat, commercially prepared, toasted, 1 slice, (25)                                                 | 50    |
|          |           | 4697  | Margarine-like, vegetable oil spread, 60% fat, stick/tub/bottle, without salt, with added vitamin D (14g) 1 tbs   | 7     |
|          |           | 1168  | Cheese, low fat, cheddar or colby, shredded (37.7)                                                                | 37.7  |
|          |           | 11529 | Tomatoes, red, ripe, raw, year round average, 1 large whole (3" diameter) (123)                                   | 61.5  |
|          |           | 11179 | Corn, sweet, yellow, frozen, kernels cut off cob, boiled, drained, without salt (165)                             | 82.5  |
|          | Dinner    | 16070 | Lentils, mature seeds, cooked, boiled, without salt (49.59)                                                       | 49.5  |
|          |           | 4053  | Oil, olive, salad or cooking                                                                                      | 13.5  |
|          |           | 11283 | Onions, cooked, boiled, drained, without salt (210)                                                               | 52.5  |
|          |           | 11478 | Squash, summer, zucchini, includes skin, cooked, boiled, drained, without salt, sliced (180)                      | 45    |
|          |           | 11821 | Peppers, sweet, red, raw, 1 Large, approx 3-3/4" long, 3" diameter (164)                                          | 37.25 |
|          |           | 16057 | Chickpeas (garbanzo beans, bengal gram), mature seeds, cooked, boiled, without salt (164)                         | 41    |
|          |           | 11179 | Corn, sweet, yellow, frozen, kernels cut off cob, boiled, drained, without salt (165)                             | 82.5  |
|          |           | 11032 | Lima beans, immature seeds, cooked, boiled, drained, without salt                                                 | 85    |
|          |           | 11885 | Tomatoes, red, ripe, canned, packed in tomato juice, no salt added (240)                                          | 120   |
|          |           | 9097  | Fruit cocktail, (peach and pineapple and pear and grape and cherry), canned, juice pack, solids and liquids (237) | 118.5 |

*continued on next page*

*continued from previous page*

|          |           |       |                                                                                                                                             |       |
|----------|-----------|-------|---------------------------------------------------------------------------------------------------------------------------------------------|-------|
|          | Snacks    | 12155 | Nuts, walnuts, english, 7 halves (14.2)                                                                                                     | 14.2  |
|          |           | 19806 | Snacks, popcorn, air-popped (Unsalted) (24)                                                                                                 | 36    |
|          |           | 1220  | Yogurt, vanilla, low fat, 11 grams protein per 8 ounce, fortified with vitamin D (245)                                                      | 245   |
|          |           | 9050  | Blueberries, raw (148)                                                                                                                      | 74    |
| Day<br>6 | Breakfast | 1256  | Yogurt, Greek, plain, nonfat (170)                                                                                                          | 170   |
|          |           | 8037  | Cereals ready-to-eat, granola, homemade (122) Made with oats, raisins, sunflower seeds, almonds, wheat germ, honey, coconut and canola oil. | 61    |
|          |           | 9302  | Raspberries, raw (120)                                                                                                                      | 60    |
|          |           | 18061 | Bread, rye, toasted, regular slice (24)                                                                                                     | 24    |
|          |           | 9040  | Bananas, raw, sliced (150)                                                                                                                  | 150   |
|          |           | 16229 | Soymilk (All flavors), lowfat, with added calcium, vitamins A and D (243)                                                                   | 243   |
|          | Lunch     | 28318 | Bread, french or vienna, whole wheat,1 slice                                                                                                | 96    |
|          |           | 6192  | Split pea soup, canned, reduced sodium, prepared with water or ready-to serve                                                               | 126.5 |
|          |           | 9266  | Pineapple, raw, all varieties, chunks (165)                                                                                                 | 82.5  |
|          | dinner    | 16126 | Tofu, firm, prepared with calcium sulfate and magnesium chloride (nigari) (63)                                                              | 63    |
|          |           | 11091 | Broccoli, cooked, boiled, drained, without salt, chopped (156)                                                                              | 39    |
|          |           | 11125 | Carrots, cooked, boiled, drained, without salt (156)                                                                                        | 78    |
|          |           | 11053 | Beans, snap, green, cooked, boiled, drained, without salt (125)                                                                             | 62.5  |
|          |           | 11305 | Peas, green, cooked, boiled, drained, without salt (160)                                                                                    | 40    |
|          |           | 16328 | Beans, kidney, all types, mature seeds, cooked, boiled, with salt (177)                                                                     | 44.25 |
|          |           | 20112 | Noodles, egg, spinach, enriched, cooked (80)                                                                                                | 120   |
|          |           | 9037  | Avocados, raw, all commercial varieties, cubes (150)                                                                                        | 75    |
|          |           | 4058  | Oil, sesame, salad or cooking                                                                                                               | 6.8   |
|          |           | 16424 | Soy sauce made from soy and wheat (shoyu), low sodium (1 tbs) 14.2g                                                                         | 14.2  |
|          | Snacks    | 18216 | Crackers, crispbread, rye, 2 crispbread (20)                                                                                                | 30    |
|          |           | 11529 | Tomatoes, red, ripe, raw, year round average, cherry tomatoes (149)                                                                         | 37.25 |

*continued on next page*

*continued from previous page*

|      |           |       |                                                                                                                  |       |
|------|-----------|-------|------------------------------------------------------------------------------------------------------------------|-------|
|      |           | 12195 | Nuts, almond butter, plain, without salt added (16)                                                              | 24    |
|      |           | 12155 | Nuts, walnuts, english, 7 halves (14.2)                                                                          | 7.1   |
|      |           | 1085  | Milk, nonfat, fluid, with added vitamin A and vitamin D (fat free or skim) (245)                                 | 245   |
| day7 | Breakfast | 8123  | Cereals, oats, instant, fortified, plain, prepared with water (boiling water added or microwaved) (117)          | 0     |
|      |           | 1085  | Milk, nonfat, fluid, with added vitamin A and vitamin D (fat free or skim) (245)                                 | 0     |
|      |           | 18076 | Bread, whole-wheat, commercially prepared, toasted, 1 slice, (25)                                                | 2.373 |
|      |           | 4697  | Margarine-like, vegetable oil spread, 60% fat, stick/tub/bottle, without salt, with added vitamin D (14g) 1 tbls | 0     |
|      |           | 1256  | Yogurt, Greek, plain, nonfat (170)                                                                               | 0     |
|      |           | 9050  | Blueberries, raw (148)                                                                                           | 0     |
|      |           | 12037 | Seeds, sunflower seed kernels, dry roasted, without salt                                                         | 0     |
|      |           | 9040  | Bananas, raw, 1 large (8" to 8-7/8" long) (136)                                                                  | 0     |
|      | Lunch     | 20029 | Couscous, cooked                                                                                                 | 0     |
|      |           | 16070 | Lentils, mature seeds, cooked, boiled, without salt (49.5)                                                       | 0     |
|      |           | 16015 | Beans, black, mature seeds, cooked, boiled, without salt (172)                                                   | 0     |
|      |           | 16057 | Chickpeas (garbanzo beans, bengal gram), mature seeds, cooked, boiled, without salt                              | 0     |
|      |           | 11305 | Peas, green, cooked, boiled, drained, without salt (160)                                                         | 0     |
|      |           | 11529 | Tomatoes, red, ripe, raw, year round average, cherry tomatoes (149)                                              | 0     |
|      |           | 9132  | Grapes,32 red or green (European type, such as Thompson seedless), raw (156.8)                                   | 0     |
|      | Dinner    | 20037 | Rice, brown, long-grain, cooked (101)                                                                            | 0     |
|      |           | 11508 | Sweet potato, cooked, baked in skin, flesh, without salt (200)                                                   | 0     |
|      |           | 11357 | Potatoes, white, flesh and skin, baked, medium (2-1/4" to 3-1/4" diameter) (173)                                 | 0     |
|      |           | 11305 | Peas, green, cooked, boiled, drained, without salt (160)                                                         | 0     |
|      |           | 11529 | Tomatoes, red, ripe, raw, year round average, cherry tomatoes (149)                                              | 0     |
|      |           | 2015  | Spices, curry powder 1 tbls (6.3g)                                                                               | 0     |
|      |           | 1256  | Yogurt, Greek, plain, nonfat (170)                                                                               | 0     |

*continued on next page*

*continued from previous page*

|      |           |       |                                                                                        |         |
|------|-----------|-------|----------------------------------------------------------------------------------------|---------|
|      |           | 1256  | Yogurt, Greek, plain, nonfat (170)                                                     | 0       |
|      |           | 9286  | Pomegranates, raw                                                                      | 0       |
|      |           | 9132  | Grapes,32 red or green (European type, such as Thompson seedless), raw (156.8)         | 0       |
|      | Snacks    | 1220  | Yogurt, vanilla, low fat, 11 grams protein per 8 ounce, fortified with vitamin D (245) | 16.6698 |
|      |           | 12016 | Seeds, pumpkin and squash seed kernels, roasted, without salt (14.2)                   | 0       |
|      |           | 9181  | Melons, cantaloupe, raw, balls (177)                                                   | 0       |
|      |           | 12063 | Nuts, almonds, dry roasted, without salt added (11 whole kernels ) (14.2)              | 0       |
| day8 | Breakfast | 9037  | Avocados, raw, all commercial varieties, sliced                                        | 73      |
|      |           | 18061 | Bread, rye, toasted, regular slice                                                     | 48      |
|      |           | 1168  | Cheese, low fat, cheddar or colby, shredded                                            | 18.85   |
|      |           | 1131  | Egg, whole, cooked, poached (1 large)                                                  | 50      |
|      |           | 1220  | Yogurt, vanilla, low fat, 11 grams protein per 8 ounce, fortified with vitamin D       | 122.5   |
|      |           | 9040  | Bananas, raw, 1 large                                                                  | 136     |
|      |           | 9316  | Strawberries, raw, 8 large                                                             | 122     |
|      |           | 9206  | Orange juice, raw                                                                      | 124.5   |
|      | Lunch     | 16057 | Chickpeas (garbanzo beans, bengal gram), mature seeds, cooked, boiled, without salt    | 41      |
|      |           | 11251 | Lettuce, cos or romaine, raw, shredded                                                 | 23.3    |
|      |           | 11821 | Peppers, sweet, red, raw,1 Large, approx 3-3/4" long, 3" diameter                      | 37.25   |
|      |           | 11529 | Tomatoes, red, ripe, raw, year round average, cherry tomatoes                          | 37.25   |
|      |           | 11206 | Cucumber, peeled, raw,sliced                                                           | 29.75   |
|      |           | 12016 | Seeds, pumpkin and squash seed kernels, roasted, without salt                          | 7.1     |
|      |           | 4635  | Salad dressing, thousand island dressing, fat-free                                     | 16      |
|      |           | 28397 | Bread, multi-grain (includes whole-grain),1 slice regular (26)                         | 26      |
|      | Dinner    | 18042 | Bread, pita, whole-wheat,1 small (4" diameter)                                         | 56      |
|      |           | 11547 | Tomato products, canned, puree, without salt added (250)                               | 62.5    |
|      |           | 1029  | Cheese, mozzarella, low moisture, part-skim, sliced (42)                               | 42      |

*continued on next page*

*continued from previous page*

|      |           |       |                                                                                       |       |
|------|-----------|-------|---------------------------------------------------------------------------------------|-------|
|      |           | 11821 | Peppers, sweet, red, raw,1 Large, approx 3-3/4" long, 3" diameter (164)               | 37.25 |
|      |           | 11457 | Spinach,raw                                                                           | 15    |
|      |           | 9195  | Olives, pickled, canned or bottled, green, 1 olive (2.7g) ) (0.41g oil)               | 10.8  |
|      |           | 6192  | Split pea soup, canned, reduced sodium, prepared with water or ready-to serve (126.5) | 126.5 |
|      |           | 1243  | Fat free ice cream, no sugar added, flavors other than chocolate (204)                | 102   |
|      | Snacks    | 19806 | Snacks, popcorn, air-popped (Unsalted) (24)                                           | 36    |
|      |           | 12152 | Nuts, pistachio nuts, dry roasted, without salt added, 24 kernels (14.2)              | 14.2  |
|      |           | 12063 | Nuts, almonds, dry roasted, without salt added (11 whole kernels ) (14.2)             | 14.2  |
|      |           | 16229 | Soymilk (All flavors), lowfat, with added calcium, vitamins A and D (243)             | 121.5 |
| day9 | Breakfast | 1256  | Yogurt, Greek, plain, nonfat                                                          | 170   |
|      |           | 8037  | Cereals ready-to-eat, granola, homemade (122)                                         | 61    |
|      |           | 9050  | Blueberries, raw (148)                                                                | 74    |
|      |           | 12037 | Seeds, sunflower seed kernels, dry roasted, without salt (14.2)                       | 7.1   |
|      |           | 18061 | Bread, rye, toasted, regular slice (24)                                               | 24    |
|      | Lunch     | 18449 | Tortillas, ready-to-bake or -fry, corn, without added salt (approx 6" diameter) (26)  | 26    |
|      |           | 9037  | Avocados, raw, all commercial varieties, sliced (146)                                 | 36.5  |
|      |           | 16015 | Beans, black, mature seeds, cooked, boiled, without salt (172)                        | 86    |
|      |           | 11821 | Peppers, sweet, red, raw,1 Large, approx 3-3/4" long, 3" diameter (164)               | 37.25 |
|      |           | 11283 | Onions, cooked, boiled, drained, without salt (210)                                   | 52.5  |
|      |           | 1168  | Cheese, low fat, cheddar or colby, shredded (37.7)                                    | 18.85 |
|      |           | 6164  | Sauce, salsa, ready-to-serve (18) 1 tbs                                               | 18    |
|      |           | 11517 | Sweet potato, frozen, cooked, baked, without salt, cubes (176)                        | 44    |
|      |           | 1085  | Milk, nonfat, fluid, with added vitamin A and vitamin D (fat free or skim) (245)      | 245   |
|      |           | 9266  | Pineapple, raw, all varieties, chunks (165)                                           | 82.5  |
|      | Dinner    | 16126 | Tofu, firm, prepared with calcium sulfate and magnesium chloride (nigari) (63)        | 63    |
|      |           | 11099 | Brussels sprouts, cooked, boiled, drained, without salt (156)                         | 78    |

*continued on next page*



*continued from previous page*

|       |           |       |                                                                                              |       |
|-------|-----------|-------|----------------------------------------------------------------------------------------------|-------|
|       |           | 20112 | Noodles, egg, spinach, enriched, cooked (80)                                                 | 120   |
|       |           | 4058  | Oil, sesame, salad or cooking                                                                | 6.8   |
|       |           | 16424 | Soy sauce made from soy and wheat (shoyu), low sodium (1 tbs) 14.2g                          | 14.2  |
|       |           | 11091 | Broccoli, cooked, boiled, drained, without salt, chopped (156)                               | 39    |
|       |           | 11053 | Beans, snap, green, cooked, boiled, drained, without salt (125)                              | 31.25 |
|       |           | 9326  | Watermelon, raw, diced (152)                                                                 | 76    |
|       | Snacks    | 18429 | Crackers, whole-wheat, low salt, 5 crackers (20)                                             | 40    |
|       |           | 16398 | Peanut butter, smooth style, without salt (16)                                               | 16    |
|       |           | 9200  | Oranges, raw, all commercial varieties, 2 small (2-3/8" diameter)(96)                        | 96    |
|       |           | 16229 | Soymilk (All flavors), lowfat, with added calcium, vitamins A and D (243)                    | 121.5 |
|       |           | 9003  | Apple, raw, with skin, 1 small small (2-3/4" diameter) (149)                                 | 149   |
|       |           | 18216 | Crackers, crispbread, rye, 2 crispbread (20)                                                 | 10    |
| day10 | Breakfast | 1130  | Egg, whole, cooked, omelet (61)                                                              | 61    |
|       |           | 11478 | Squash, summer, zucchini, includes skin, cooked, boiled, drained, without salt, sliced (180) | 45    |
|       |           | 11261 | Mushrooms, white, cooked, boiled, drained, without salt (156)                                | 39    |
|       |           | 11234 | Kale, cooked, boiled, drained, without salt (130)                                            | 32.5  |
|       |           | 11821 | Peppers, sweet, red, raw,1 Large, approx 3-3/4" long, 3" diameter (164)                      | 37.25 |
|       |           | 11547 | Tomato products, canned, puree, without salt added (250)                                     | 62.5  |
|       |           | 18036 | Bread, multi-grain, toasted (includes whole-grain), 1 slice, (24)                            | 48    |
|       |           | 4631  | Margarine-like, vegetable oil spread, fat-free, tub (14.6) (0.44)                            | 14.6  |
|       |           | 9206  | Orange juice, raw (248)                                                                      | 248   |
|       | Lunch     | 16070 | Lentils, mature seeds, cooked, boiled, without salt (49.59)                                  | 74.25 |
|       |           | 11125 | Carrots, cooked, boiled, drained, without salt (156)                                         | 78    |
|       |           | 11885 | Tomatoes, red, ripe, canned, packed in tomato juice, no salt added (240)                     | 60    |
|       |           | 4053  | Oil, olive, salad or cooking                                                                 | 13.5  |
|       |           | 11357 | Potatoes, white, flesh and skin, baked, medium (2-1/4" to 3-1/4" diameter) (173)             | 86.5  |

*continued on next page*

*continued from previous page*

|       |           |       |                                                                                  |       |
|-------|-----------|-------|----------------------------------------------------------------------------------|-------|
|       |           | 11357 | Potatoes, white, flesh and skin, baked, medium (2-1/4" to 3-1/4" diameter) (173) | 86.5  |
|       |           | 1180  | Sour cream, fat free (12g ) 1 tbls                                               | 12    |
|       |           | 1085  | Milk, nonfat, fluid, with added vitamin A and vitamin D (fat free or skim) (245) | 245   |
|       |           | 9326  | Watermelon, raw, 12 balls (146.4)                                                | 73.2  |
|       | Dinner    | 16126 | Tofu, firm, prepared with calcium sulfate and magnesium chloride (nigari) (63)   | 63    |
|       |           | 20037 | Rice, brown, long-grain, cooked (101)                                            | 151.5 |
|       |           | 11125 | Carrots, cooked, boiled, drained, without salt (156)                             | 78    |
|       |           | 11053 | Beans, snap, green, cooked, boiled, drained, without salt (125)                  | 62.5  |
|       |           | 4058  | Oil, sesame, salad or cooking                                                    | 6.8   |
|       |           | 28318 | Bread, french or vienna, whole wheat,1 slice (48)                                | 52    |
|       |           | 9003  | Apple, raw, with skin, 1 small small (2-3/4" diameter) (149)                     | 149   |
|       |           | 1243  | Fat free ice cream, no sugar added, flavors other than chocolate                 | 102   |
|       | Snacks    | 1256  | Yogurt, Greek, plain, nonfat                                                     | 85    |
|       |           | 9326  | Watermelon, raw, 12 balls (146.4)                                                | 146.4 |
|       |           | 1085  | Milk, nonfat, fluid, with added vitamin A and vitamin D (fat free or skim) (245) | 245   |
|       |           | 19806 | Snacks, popcorn, air-popped (Unsalted) (24)                                      | 24    |
| day11 | Breakfast | 1130  | Egg, whole, cooked, omelet (61)                                                  | 61    |
|       |           | 11011 | Asparagus, raw (134)                                                             | 33.5  |
|       |           | 11921 | Peppers, sweet, red, sauteed (106)                                               | 26.4  |
|       |           | 11529 | Tomatoes, red, ripe, raw, year round average, cherry tomatoes (149)              | 37.25 |
|       |           | 11457 | Spinach,raw                                                                      | 15    |
|       |           | 1168  | Cheese, low fat, cheddar or colby, shredded (37.7)                               | 37.7  |
|       |           | 18036 | Bread, multi-grain, toasted (includes whole-grain), 1 slice, (24)                | 48    |
|       |           | 4631  | Margarine-like, vegetable oil spread, fat-free, tub (14.6) (0.44)                | 14.6  |
|       |           | 1085  | Milk, nonfat, fluid, with added vitamin A and vitamin D (fat free or skim) (245) | 245   |
|       | Lunch     | 18042 | Bread, pita, whole-wheat,1 small (4" diameter) (28)                              | 56    |

*continued on next page*

*continued from previous page*

|       |           |       |                                                                                        |        |
|-------|-----------|-------|----------------------------------------------------------------------------------------|--------|
|       |           | 11206 | Cucumber, peeled, raw,sliced (119)                                                     | 29.75  |
|       |           | 11283 | Onions, cooked, boiled, drained, without salt (210)                                    | 52.5   |
|       |           | 16138 | Falafel, home-prepared, patty (approx 2-1/4" diameter) (17)                            | 17     |
|       |           | 4053  | Oil, olive, salad or cooking                                                           | 6.75   |
|       |           | 9252  | Pears, raw,1 medium                                                                    | 178    |
|       | Dinner    | 20029 | Couscous, cooked                                                                       | 157.6  |
|       |           | 11032 | Lima beans, immature seeds, cooked, boiled, drained, without salt                      | 42.5   |
|       |           | 16043 | Beans, pinto, mature seeds, cooked, boiled, without salt (171)                         | 61.125 |
|       |           | 11529 | Tomatoes, red, ripe, raw, year round average, 1 large whole (3" diameter) (123)        | 61.5   |
|       |           | 11333 | Peppers, sweet, green, raw,chopped                                                     | 74.5   |
|       |           | 9195  | Olives, pickled, canned or bottled, green, 1 olive                                     | 10.8   |
|       |           | 4053  | Oil, olive, salad or cooking                                                           | 13.5   |
|       |           | 28318 | Bread, french or vienna, whole wheat,1 slice (48)                                      | 26     |
|       |           | 9040  | Bananas, raw, 1 large (8" to 8-7/8" long) (136)                                        | 136    |
|       | Snacks    | 18216 | Crackers, crispbread, rye, 2 crispbread (20)                                           | 30     |
|       |           | 16158 | Hummus, commercial (2 tbs) (30)                                                        | 30     |
|       |           | 1085  | Milk, nonfat, fluid, with added vitamin A and vitamin D (fat free or skim) (245)       | 245    |
|       |           | 1220  | Yogurt, vanilla, low fat, 11 grams protein per 8 ounce, fortified with vitamin D (245) | 122.5  |
|       |           | 9316  | Strawberries, raw, halves (152)                                                        | 152    |
| day12 | Breakfast | 1256  | Yogurt, Greek, plain, nonfat (170)                                                     | 85     |
|       |           | 8122  | Cereals, oats, instant, fortified, plain, dry, 1 packet (28)                           | 14     |
|       |           | 9040  | Bananas, raw, 1 large (8" to 8-7/8" long) (136)                                        | 136    |
|       |           | 9316  | Strawberries, raw, 8 large (1-3/8" diameter), (144)                                    | 122    |
|       |           | 9206  | Orange juice, raw (248)                                                                | 124.5  |
|       |           | 12037 | Seeds, sunflower seed kernels, dry roasted, without salt (14.2)                        | 14.2   |
|       |           | 12016 | Seeds, pumpkin and squash seed kernels, roasted, without salt (14.2)                   | 7.1    |

*continued on next page*

*continued from previous page*

|       |           |       |                                                                                                                   |       |
|-------|-----------|-------|-------------------------------------------------------------------------------------------------------------------|-------|
|       |           | 18076 | Bread, whole-wheat, commercially prepared, toasted, 1 slice, (25)                                                 | 50    |
|       |           | 16398 | Peanut butter, smooth style, without salt (16)                                                                    | 16    |
|       | Lunch     | 11210 | Eggplant, cooked, boiled, drained, without salt (99)                                                              | 49.5  |
|       |           | 11305 | Peas, green, cooked, boiled, drained, without salt (160)                                                          | 80    |
|       |           | 11529 | Tomatoes, red, ripe, raw, year round average, 1 large whole (3" diameter) (123)                                   | 61.5  |
|       |           | 1029  | Cheese, mozzarella, low moisture, part-skim, shredded (28.7)                                                      | 28.7  |
|       |           | 20037 | Rice, brown, long-grain, cooked (101)                                                                             | 101   |
|       |           | 16229 | Soymilk (All flavors), lowfat, with added calcium, vitamins A and D (243)                                         | 243   |
|       |           | 9097  | Fruit cocktail, (peach and pineapple and pear and grape and cherry), canned, juice pack, solids and liquids (237) | 121.5 |
|       | Dinner    | 16126 | Tofu, firm, prepared with calcium sulfate and magnesium chloride (nigari) (63)                                    | 63    |
|       |           | 20112 | Noodles, egg, spinach, enriched, cooked (80)                                                                      | 120   |
|       |           | 11091 | Broccoli, cooked, boiled, drained, without salt, chopped (156)                                                    | 39    |
|       |           | 11125 | Carrots, cooked, boiled, drained, without salt (156)                                                              | 78    |
|       |           | 11053 | Beans, snap, green, cooked, boiled, drained, without salt (125)                                                   | 62.5  |
|       |           | 11305 | Peas, green, cooked, boiled, drained, without salt (160)                                                          | 40    |
|       |           | 16028 | Beans, kidney, all types, mature seeds, cooked, boiled, without salt (177)                                        | 44.25 |
|       |           | 4058  | Oil, sesame, salad or cooking                                                                                     | 6.8   |
|       |           | 16424 | Soy sauce made from soy and wheat (shoyu), low sodium (1 tbs) 14.2g                                               | 14.2  |
|       | Snacks    | 16229 | Soymilk (All flavors), lowfat, with added calcium, vitamins A and D (243)                                         | 121.5 |
|       |           | 18061 | Bread, rye, toasted, regular slice (24)                                                                           | 48    |
|       |           | 28399 | Cookies, animal crackers (includes arrowroot, tea biscuits), 7 biscuits                                           | 8.75  |
| day13 | Breakfast | 8123  | Cereals, oats, instant, fortified, plain, prepared with water (boiling water added or microwaved) (117)           | 117   |
|       |           | 12037 | Seeds, sunflower seed kernels, dry roasted, without salt (14.2)                                                   | 7.1   |
|       |           | 1256  | Yogurt, Greek, plain, nonfat (170)                                                                                | 85    |
|       |           | 9302  | Raspberries, raw (120)                                                                                            | 60    |

*continued on next page*

*continued from previous page*

|       |           |       |                                                                                       |        |
|-------|-----------|-------|---------------------------------------------------------------------------------------|--------|
|       |           | 12195 | Nuts, almond butter, plain, without salt added 1/2 tbls                               | 8      |
|       |           | 18061 | Bread, rye, toasted, regular slice (24)                                               | 48     |
|       |           | 9003  | Apple, raw, with skin, 1 small small (2-3/4" diameter) (149)                          | 149    |
|       | Lunch     | 20029 | Couscous, cooked                                                                      | 138.75 |
|       |           | 16070 | Lentils, mature seeds, cooked, boiled, without salt (49.59)                           | 49.5   |
|       |           | 16015 | Beans, black, mature seeds, cooked, boiled, without salt (172)                        | 43     |
|       |           | 16057 | Chickpeas (garbanzo beans, bengal gram), mature seeds, cooked, boiled, without salt   | 82     |
|       |           | 11305 | Peas, green, cooked, boiled, drained, without salt (160)                              | 80     |
|       |           | 11821 | Peppers, sweet, red, raw, chopped (149)                                               | 37.25  |
|       |           | 1019  | Cheese, feta, crumbled (150)                                                          | 37.5   |
|       |           | 16229 | Soymilk (All flavors), lowfat, with added calcium, vitamins A and D (243)             | 121.5  |
|       | Dinner    | 11357 | Potatoes, white, flesh and skin, baked, medium (2-1/4" to 3-1/4" diameter) (173)      | 173    |
|       |           | 11305 | Peas, green, cooked, boiled, drained, without salt (160)                              | 160    |
|       |           | 11529 | Tomatoes, red, ripe, raw, year round average, cherry tomatoes (149)                   | 37.25  |
|       |           | 11179 | Corn, sweet, yellow, frozen, kernels cut off cob, boiled, drained, without salt (165) | 82.5   |
|       |           | 20125 | Pasta, whole-wheat, cooked , shells (52.5)                                            | 52.5   |
|       |           | 11547 | Tomato products, canned, puree, without salt added (250)                              | 62.5   |
|       |           | 1032  | Cheese, parmesan, grated (42.5)                                                       | 21.25  |
|       |           | 9266  | Pineapple, raw, all varieties, chunks (165)                                           | 82.5   |
|       | Snacks    | 18216 | Crackers, crispbread, rye, 2 crispbread (20)                                          | 20     |
|       |           | 16158 | Hummus, commercial (2 tbls) (30)                                                      | 30     |
|       |           | 1085  | Milk, nonfat, fluid, with added vitamin A and vitamin D (fat free or skim) (245)      | 245    |
| day14 | Breakfast | 43449 | Beans, baked, canned, no salt added (253)                                             | 126.5  |
|       |           | 18076 | Bread, whole-wheat, commercially prepared, toasted                                    | 50     |
|       |           | 4631  | Margarine-like, vegetable oil spread, fat-free, tub (14.6) (0.44)                     | 7.3    |
|       |           | 1085  | Milk, nonfat, fluid, with added vitamin A and vitamin D (fat free or skim) (245)      | 245    |

*continued on next page*

*continued from previous page*

|  |        |       |                                                                                                                                             |       |
|--|--------|-------|---------------------------------------------------------------------------------------------------------------------------------------------|-------|
|  |        | 9040  | Bananas, raw, sliced (150)                                                                                                                  | 75    |
|  | Lunch  | 20013 | Bulgur, cooked (91)                                                                                                                         | 91    |
|  |        | 4053  | Oil, olive, salad or cooking                                                                                                                | 6.75  |
|  |        | 11283 | Onions, cooked, boiled, drained, without salt (210)                                                                                         | 52.5  |
|  |        | 11529 | Tomatoes, red, ripe, raw, year round average, cherry tomatoes (149)                                                                         | 37.25 |
|  |        | 11478 | Squash, summer, zucchini, includes skin, cooked, boiled, drained, without salt, sliced (180)                                                | 45    |
|  |        | 11457 | Spinach,raw (60)                                                                                                                            | 15    |
|  |        | 11179 | Corn, sweet, yellow, frozen, kernels cut off cob, boiled, drained, without salt (165)                                                       | 82.5  |
|  |        | 9152  | Lemon juice, raw                                                                                                                            | 5.9   |
|  |        | 9266  | Pineapple, raw, all varieties, chunks (165)                                                                                                 | 82.5  |
|  | Dinner | 20125 | Pasta, whole-wheat, cooked , penne (48.5)                                                                                                   | 48.5  |
|  |        | 11547 | Tomato products, canned, puree, without salt added (250)                                                                                    | 62.5  |
|  |        | 11365 | Potatoes, boiled, cooked in skin, flesh, without salt chopped                                                                               | 156   |
|  |        | 11125 | Carrots, cooked, boiled, drained, without salt (156)                                                                                        | 78    |
|  |        | 11305 | Peas, green, cooked, boiled, drained, without salt (160)                                                                                    | 40    |
|  |        | 11092 | Broccoli, frozen,chopped, unprepared (156)                                                                                                  | 39    |
|  |        | 1168  | Cheese, low fat, cheddar or colby, shredded (37.7)                                                                                          | 18.85 |
|  |        | 9302  | Raspberries, raw (120)                                                                                                                      | 60    |
|  |        | 1235  | Yogurt, frozen, flavors not chocolate, nonfat milk, with low-calorie sweetener (136)                                                        | 136   |
|  | Snacks | 8037  | Cereals ready-to-eat, granola, homemade (122) Made with oats, raisins, sunflower seeds, almonds, wheat germ, honey, coconut and canola oil. | 61    |
|  |        | 1256  | Yogurt, Greek, plain, nonfat (170)                                                                                                          | 85    |
|  |        | 9050  | Blueberries, raw (148)                                                                                                                      | 74    |
|  |        | 16398 | Peanut butter, smooth style, without salt (16)                                                                                              | 16    |
|  |        | 18216 | Crackers, crispbread, rye, 2 crispbread (20)                                                                                                | 20    |
|  |        | 16158 | Hummus, commercial (2 tbs) (30)                                                                                                             | 15    |

## Energy intakes and outliers

We report below the results of our analysis when using different cut-offs for energy. In fact, we used a pragmatic range 200 - 1200 kcal in order to exclude extreme values. However, one could also exclude outliers based on some data-driven approach. For example, based on Tukey’s definition, outliers can be defined as values outside of the interval:

$$[Q_1 - k(Q_3 - Q_1), Q_3 + k(Q_3 - Q_1)]$$

where  $Q_1$  and  $Q_3$  are respectively the first and third quartiles. A common choice for  $k$  is 1.5.

Table 5 below shows the distributions of energy intakes after excluding outliers. Using  $k = 1.5$ , non-outliers fall in the range 0 – 1262 kcal.

Table 5: Quantiles of energy intakes of NHANES meals (kcal), after excluding outliers.

| Quartile | 0% | 25% | 50% | 75% | 100% |
|----------|----|-----|-----|-----|------|
| kcal     | 0  | 120 | 292 | 518 | 1262 |

Below, we report the results of the linear regression model after excluding outliers (with  $k = 1.5$ ), therefore taking only meals with energy content in below 1262 kcal. The correlation between predicted and actual HEI on test data was 0.6.

Table 6: Linear regression model for HEI2010 as a function of MBI

|                 | Coefficient estimate | Standard error | p-value  |
|-----------------|----------------------|----------------|----------|
| Breakfast       | 0.22                 | 0.02           | < 2e-16  |
| Lunch           | 0.19                 | 0.02           | 1.51e-14 |
| Snack           | 0.28                 | 0.02           | < 2e-16  |
| Dinner          | 0.15                 | 0.02           | 1.54e-09 |
| Age             | 0.13                 | 0.01           | < 2e-16  |
| Gender (female) | -0.15                | 0.69           | 0.82     |
| Energy          | -0.001               | 0.001          | 0.08     |

The optimal Ridge regularization parameter was selected by cross-validation and was estimated to be 0.03.

Table7 below replicates table 7 in the analysis, using meals in the range 0 – 1262 kcal.

Table 7: Association between lunch scores and density of food groups and nutrients. All units are expressed per 2000 kcal. Different letters indicate statistically different distributions (pairwise Wilcoxon test, 95% confidence level). Recommendations based on the US dietary guidelines, when applicable.

| Food groups             | Tertile of meal score |                  |                   | Unit             | Recommendation. |
|-------------------------|-----------------------|------------------|-------------------|------------------|-----------------|
|                         | [0, 43]               | (43, 55]         | (55, 100]         |                  |                 |
| Dairy                   | 2.3 <sup>a</sup>      | 1.9 <sup>b</sup> | 1.7 <sup>b</sup>  | cup-eq/2000 kcal | 3 cup-eq        |
| Fruits                  | 1 <sup>a</sup>        | 1.4 <sup>b</sup> | 2 <sup>c</sup>    | cup-eq/2000 kcal | 2 cup-eq        |
| Citrus, melons, berries | 0.1 <sup>a</sup>      | 0.3 <sup>b</sup> | 0.5 <sup>c</sup>  | cup-eq/2000 kcal |                 |
| Grains                  | 5.9 <sup>a</sup>      | 8.1 <sup>b</sup> | 10.2 <sup>c</sup> | oz-eq/2000 kcal  | 6 oz-eq         |
| Whole Grains            | 0.4 <sup>a</sup>      | 0.9 <sup>b</sup> | 1.8 <sup>c</sup>  | oz-eq/2000 kcal  | 3 oz-eq         |
| Nuts and seeds          | 0.2 <sup>a</sup>      | 0.4 <sup>b</sup> | 0.7 <sup>c</sup>  | oz-eq/2000 kcal  |                 |
| Solid fats              | 37 <sup>a</sup>       | 25 <sup>b</sup>  | 17 <sup>c</sup>   | g/2000 kcal      |                 |
| <b>Vitamins</b>         |                       |                  |                   |                  |                 |
| Folate                  | 323 <sup>a</sup>      | 468 <sup>b</sup> | 525 <sup>c</sup>  | μg/2000 kcal     | 400 μg          |
| Vit A                   | 628 <sup>a</sup>      | 764 <sup>b</sup> | 748 <sup>c</sup>  | μg/2000 kcal     | 900 μg          |
| Vit C                   | 87 <sup>a</sup>       | 123 <sup>b</sup> | 146 <sup>c</sup>  | mg/2000 kcal     | 90 mg           |
| Vit E                   | 7.2 <sup>a</sup>      | 8 <sup>a</sup>   | 8.7 <sup>b</sup>  | μg /2000 kcal    | 15 μg           |
| Vit K                   | 168 <sup>a</sup>      | 202 <sup>b</sup> | 184 <sup>c</sup>  | μg/2000 kcal     | 120 μg          |
| <b>Minerals</b>         |                       |                  |                   |                  |                 |
| Copper                  | 1 <sup>a</sup>        | 1.4 <sup>b</sup> | 1.6 <sup>c</sup>  | mg/2000 kcal     | 0.9 mg          |
| Magnesium               | 224 <sup>a</sup>      | 298 <sup>b</sup> | 348 <sup>c</sup>  | mg/2000 kcal     | 420 mg          |
| 7.48 8.94 9.54 Zinc     | 7.5 <sup>a</sup>      | 8.9 <sup>b</sup> | 9.5 <sup>c</sup>  | mg/2000 kcal     | 11 mg           |
| <b>Macronutrients</b>   |                       |                  |                   |                  |                 |
| Energy                  | 440 <sup>a</sup>      | 464 <sup>b</sup> | 438 <sup>c</sup>  | kcal             |                 |
| Total sugar             | 157 <sup>a</sup>      | 123 <sup>b</sup> | 107 <sup>c</sup>  | g/2000 kcal      |                 |
| Cholesterol             | 139 <sup>a</sup>      | 115 <sup>b</sup> | 23 <sup>c</sup>   | mg/2000 kcal     |                 |
